# Supplementary material for: Multi-affinity sites of magnetic guanidyl-functionalized metal–organic framework nanospheres for efficient enrichment of global phosphopeptides
Source: Royal Society of Chemistry journal article supplement (doi:10.1039/c8nr01914b), 2018-01-01
Supplement: c8nr01914b1.pdf [file c8nr01914b1.pdf]

Supplementary Information

**Multi-affinity sites of magnetic guanidyl-functionalized metal-organic framework nanospheres for efficient enrichment of global phosphopeptides**

Bin Luo, Minggang Yang, Peipei Jiang, Fang Lan\*, and Yao Wu\*

**1. Materials**

Iron(III) chloride hexahydrate ( $\text{FeCl}_3 \cdot 6\text{H}_2\text{O}$ ), ammonium acetate ( $\text{NH}_4\text{Ac}$ ), zinc nitrate hexahydrate ( $\text{Zn}(\text{NO}_3)_2 \cdot 6\text{H}_2\text{O}$ ), L-arginine (Arg), bovine serum albumin (BSA),  $\beta$ -casein (from bovine milk), trypsin (TPCK treated), dithiothreitol (DTT), iodoacetamide (IAA), and 2,5-dihydroxyl benzoic acid (DHB) were purchased from Sigma Aldrich (St. Louis, MO, USA). Commercial  $\text{TiO}_2$  microspheres, 2-amino terephthalic acid, 1-(3-Dimethylaminopropyl)-3-ethylcarbodiimide hydrochloride (EDC), polyetherimide (PEI, Mw 25,000), and polyvinyl pyrrolidone (PVP, Mw 50,000) were purchased from Aladdin (Shanghai, China). Trisodium citrate dehydrate ( $\text{Na}_3\text{CT}$ ), acetic acid (HAC), ethylene glycol (EG), urea, ammonium bicarbonate ( $\text{NH}_4\text{HCO}_3$ ), acetonitrile (ACN), anhydrous ethanol, and dimethyl formamide (DMF) were purchased from Forest Science and Technology Development Co. Ltd. (Chengdu, China). HOBT was purchased from GL Biochem (Shanghai, China). N,N-Diisopropylethylamine and trifluoroacetic acid (TFA) were obtained from AstaTech (Chengdu, China). The non-fat milk was obtained from a local supermarket.

**2. Synthesis of the SPIOs@PVP-PEI@MOF@Arg nanospheres (SPMA nanospheres)**

**2.1 Synthesis of the  $\text{Fe}_3\text{O}_4$  nanoparticles (SPIOs)**

The  $\text{Fe}_3\text{O}_4$  nanoparticles were synthesized by hydrothermal reaction. Briefly, 1.157 g  $\text{FeCl}_3 \cdot 6\text{H}_2\text{O}$ , 3.303g  $\text{NH}_4\text{Ac}$ , and 0.400 g  $\text{Na}_3\text{CT}$  were dissolved in EG (60 mL) under magnetic stirring. The magnetic stirring bar was removed after stirring for one hour. The mixture was added in the Teflon-line stainless-steel autoclave and maintained at 200 °C for 16 h. Then, the sediment were collected under an external magnetic field. After that, the sediment was thoroughly washed with ethyl alcohol and water for several times. Finally, the  $\text{Fe}_3\text{O}_4$  nanoparticles were re-dispersed in deionized water (15 mL) for subsequent use.

**2.2 Synthesis of the SPIO@PVP-PEI nanospheres**

Firstly, 0.4 g PEI and 1.0 g PVP were dissolved in 20 mL deionized water. Then, 5 mL the above SPIOs suspension was added to the above mixed solution under magnetic stirring for 24 h. The products were collected by an external magnetic field and washed with water and DMF alternately for several times. Finally, the SPIO@PVP-PEI nanospheres were re-dispersed in DMF (2 mL) for subsequent use.

**2.3 Synthesis of the SPIOs@PVP-PEI@MOF nanospheres**

1 The above SPIO@PVP-PEI nanospheres (400  $\mu$ L) was dispersed in the mixture solution containing HAC (100  $\mu$ L),  
2 H<sub>2</sub>O (2 mL), DMF (13 mL), Zn(NO<sub>3</sub>)<sub>2</sub>·6H<sub>2</sub>O (1 g), and 2-amino terephthalic acid (220 mg). Then, the mixture was  
3 heated at 100°C for 2 h under vigorous stirring. After that, the brownish yellow products were collected by  
4 magnetic separation and washed with DMF and water for several times, respectively. Finally, the obtained  
5 SPIOs@PVP-PEI@MOF nanospheres were dispersed in deionized water (1 mL) for further use.

6  
7

#### 8 **2.4 Synthesis of the SPIOs@PVP-PEI@MOF@Arg nanospheres (SPMA nanospheres)**

9 L-arginine (208 mg), EDCI (345 mg), and HOBT (243 mg) were added into the mixture solution containing H<sub>2</sub>O  
10 (1.5 mL), DMF (13 mL), and DIPEA (590  $\mu$ L). The solution was stirred for 1 h, following which the above  
11 SPIOs@PVP-PEI@MOF nanospheres (500  $\mu$ L) was added and continuously stirred for an additional 24 h at room  
12 temperature. After that, the products were collected by magnetic separation and washed with DMF and water for  
13 several times, respectively. Finally, the obtained SPMA nanospheres were dispersed in deionized water (1 mL) for  
14 further use.

15  
16

#### 17 **2.5 Synthesis of SPIOs@NH<sub>2</sub> nanospheres**

18 The above SPIOs suspension (1 mL) and 2-amino terephthalic acid (1 g) were added in DMF (15 ml). The solution  
19 was continuously stirred for 24 h at room temperature. After that, the products were collected by magnetic  
20 separation and washed with DMF and water for several times, respectively. Finally, the obtained SPIOs@NH<sub>2</sub>  
21 nanospheres were dispersed in deionized water (1 mL) for further use.

22  
23

### 24 **3. Phosphopeptide enrichment experiments**

25

#### 26 **3.1 Preparation of tryptic digests of standard proteins**

27  $\beta$ -casein (1 mg) was dissolved in 1 mL 50 mM NH<sub>4</sub>HCO<sub>3</sub> solution at pH 8.2 and digested with trypsin (40:1, w/w)  
28 at 37 °C for 16 h. 10 mg of BSA was dissolved in 1 mL 50 mM NH<sub>4</sub>HCO<sub>3</sub> solution containing urea (8 mol L<sup>-1</sup>).  
29 The mixture was incubated at 60 °C for 1 h to reduce the disulfide bonds of proteins after the addition of 100  $\mu$ L of  
30 DTT (1 mol L<sup>-1</sup>). Subsequently, 37 mg of IAA was added and the mixture was incubated at room temperature in  
31 the dark for 45 min. Finally, the mixture was diluted with NH<sub>4</sub>HCO<sub>3</sub> (50 mmol L<sup>-1</sup>, pH = 8.2) and incubated at 37  
32 °C for 16 h with trypsin at the mass ratio of enzyme to protein of 1:40 (w/w).

33  
34

#### 35 **3.2 Preparation of tryptic digests of proteins extracted from nonfat milk**

36 Thirty  $\mu$ L nonfat milk was dissolved in 1 mL 25 mM NH<sub>4</sub>HCO<sub>3</sub>, and this solution was centrifuged at 14000 rpm  
37 for 20 min. The supernate was collected and proceeded at 100 °C for 10 min to make the protein degeneration. The  
38 supernate was digested with trypsin (40  $\mu$ g) at 37 °C for 16 h. This tryptic digest of nonfat milk was diluted by  
39 loading buffer for further use.

40  
41

#### 42 **3.3 Enrichment of phosphopeptides from $\beta$ -casein tryptic digestions**

43 The above SPIOs@NH<sub>2</sub> nanospheres, SPIOs@PVP-PEI@MOF nanospheres, and SPMA nanospheres in  
44 deionized water (1 mL) were separated by magnetic separation and washed with loading buffer 1 (50% ACN-H<sub>2</sub>O,

1 0.1 mol L<sup>-1</sup> Hac) for three times and then were dispersed in 1ml loading buffer 1 (50% ACN-H<sub>2</sub>O, 0.1 mol L<sup>-1</sup>  
2 Hac), respectively. In a typical enrichment process, 20 μL of the material suspension (5 mg/mL) was added to 100  
3 μL of peptide solution (β-casein tryptic digest was diluted with loading buffer1 to different concentrations) and the  
4 mixture was then incubated in a shaker at room temperature for 45 min to ensure equilibrium. After magnetic  
5 separation and removal of the supernatant, the material were washed three times with loading buffer 1 (400 μL) to  
6 remove the nonspecifically adsorbed peptides. The captured phosphopeptides were eluted by 10 μL buffer 2 (50%  
7 ACN-H<sub>2</sub>O containing 2% TFA) under powerful shaking for 10 min. The eluate was analyzed by MALDI-TOF MS.

### 8 9 10 **3.4 Enrichment of phosphopeptides from the tryptic digest mixtures of β-casein and BSA**

11 The tryptic digest of β-casein and BSA were diluted with loading buffer 1 (50% ACN-H<sub>2</sub>O, 0.1 mol L<sup>-1</sup> Hac) at  
12 different molar ratio. Then, 20 μL of SPMA nanospheres suspension (5 mg/mL) was added to 100 μL of the  
13 aboved mixture of β-casein and BSA digest. After similar enrichment, washing, and elution protocol was followed,  
14 the eluent was analyzed by MALDI-TOF MS.

### 15 16 17 **3.5 Enrichment of phosphopeptides from nonfat milk tryptic digestions**

18 The tryptic digest of nonfat milk was diluted with loading buffer 1 (50% ACN-H<sub>2</sub>O, 0.1 mol L<sup>-1</sup> Hac) at proper  
19 concentration. Then, 20 μL of SPMA nanospheres suspension (5 mg/mL) was added to 100 μL of the aboved  
20 solution. After similar enrichment, washing, and elution protocol was followed, the eluent was analyzed by  
21 MALDI-TOF MS.

### 22 23 24 **3.6 MALDI-TOF MS Analysis**

25 All eluent samples were analyzed in reflector positive mode on AB Sciex 5800 MALDI-TOF/TOF mass  
26 spectrometer (AB SCIEX, CA). Matrix DHB was dissolved in 70% ACN-H<sub>2</sub>O containing 1% H<sub>3</sub>PO<sub>4</sub> (25 mg  
27 mL<sup>-1</sup>). A 1 μL aliquot of the eluent and 1 μL of DHB matrix were sequentially dropped onto the MALDI plate for  
28 MS analysis.

### 29 30 31 **3.7 Preparation of tryptic digests of proteins extracted from rat brain lysate**

32 A Sprague Dawley male rat was sacrificed, and its brain was promptly taken out, then cut into bits, and washed  
33 with saline. Then, the brain tissues were minced with scissors and homogenized for 30 min. Above sample were  
34 diluted in 4% SDS, 100 mM Tris-HCl (pH 8.0), and 100 mM DTT and heated at 100°C for 5 min. The sample was  
35 then cooled to room temperature and loaded onto an ultrafiltration filter followed by centrifugation at 14000×g for  
36 30 min. One hundred microliters of 50 mM iodoacetamide was subsequently added to the filter, and the samples  
37 were then incubated for 30 min at room temperature. Next, 100 μL of 25 mM ABC (Applied Biosystems, Foster  
38 City, CA, USA) was added to each filter, followed by centrifugation at 14000 × g for 30 min. The protein  
39 suspensions were then digested with 40 μL of trypsin buffer at 37°C for 18 h. Finally, the filter unit was transferred  
40 to a new tube, added 40 μL 25 mM ABC and centrifuged at 14000 × g for 30 min. The resulting peptides were  
41 collected, and lyophilized for further use.

### 42 43 44 **3.8 Enrichment of phosphopeptides from rat brain lysate digestions**

1 Tryptic digest of rat brain lysate (0.5 mg) was diluted with 500  $\mu$ L loading buffer 1 (50% ACN-H<sub>2</sub>O, 0.1 mol L<sup>-1</sup>  
2 Hac), and the sample processing was same as that of peptide mixture enrichment. The eluted solution was analyzed  
3 by Elite-LC-MS/MS.

4

### 5 **3.9 Elite-LC-MS/MS Analysis**

6 The samples were analyzed using Easy-nLC nanoflow HPLC system connected to Orbitrap Elite mass  
7 spectrometer (Thermo Fisher Scientific, San Jose, CA, USA). One microgram of each sample was loaded onto  
8 Thermo Scientific EASY column (two columns) at a flow rate of 200 nL/min. The sequential separation of  
9 peptides on Thermo Scientific EASY trap column (100  $\mu$ m $\times$ 2 cm, 5  $\mu$ m, 100 Å, C18) and analytical column (75  
10  $\mu$ m $\times$ 25 cm, 5  $\mu$ m, 100 Å, C18) was accomplished using a segmented 1h gradient from 5% to 28% Solvent B (0.1%  
11 formic acid in 100% ACN) for 40 min, followed by 28-90% Solvent B for 2 min and then 90% Solvent B for 18  
12 min. The mass spectrometer was operated in positive ion mode, and MS spectra were acquired over a range of  
13 350-2000 m/z. The dynamic exclusion duration was 30s.

14 The acquired data from triplicate MS runs for each sample were combined and searched against the uniprot rat  
15 protein sequence database (version 1.4.1.1). Proteins were identified using the Andromeda peptide search engine  
16 integrated into the MaxQuant environment. A decoy version of the Self-database was used to estimate peptide and  
17 protein false discovery rate. We used MaxQuant to calculate LFQ, a measure of protein abundance. The LFQ value  
18 is obtained, and is on average highly correlated with protein abundance.

19

## 20 **4. Characterization**

21 Scanning electron microscopy (SEM, Hitachi S-4800, Japan) and transmission electron microscopy (TEM, JEM-  
22 2010, Japan electronic) were used to analysis the morphologies of the samples. The size distribution and zeta  
23 potential were calculated via dynamic light scattering (DLS, Zetasizer Nano ZS90, Malvern Company). Crystal  
24 structure with angles from 5° to 70° was tested by powder X-ray diffraction (XRD, X' Pert Pro MPD, Philips,  
25 Netherlands). Surface area and pore size analyzer (QuadraSorb SI, America) was employed to study the surface  
26 and BJH pore size distribution at 77K. Fourier transform infrared spectra was obtained by spectrometer (FT-IR, PE  
27 spectrometer) with wave number range 500-4000 cm<sup>-1</sup>. The mass loss of sample was analyzed at temperature  
28 ranging from 35 to 900 °C with the heating rate of 10K/min by simultaneous thermal analysis (STA449 C Jupiter,  
29 NETZSCH). Vibrating sample magnetometer (VSM, model BHV-525, Riken Japanese Electronics Company) was  
30 employed to measure the magnetization of the sample with field from 0 Oe to 18000 Oe at 300K.

31

32

33

34

35

36

37

38

39

40

41

42

43

44

45

1  
2  
3  
4

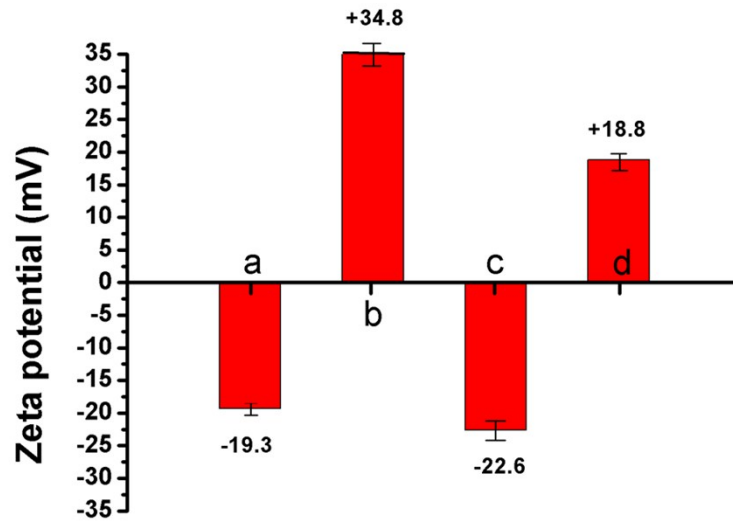

5 **Fig. S1** Zeta potential of the (a) SPIOs, (b) SPIOs@PVP-PEI nanospheres, (c) SPIOs@PVP-PEI@MOF  
6 nanospheres, and (d) the SPMA nanospheres.

7  
8  
9

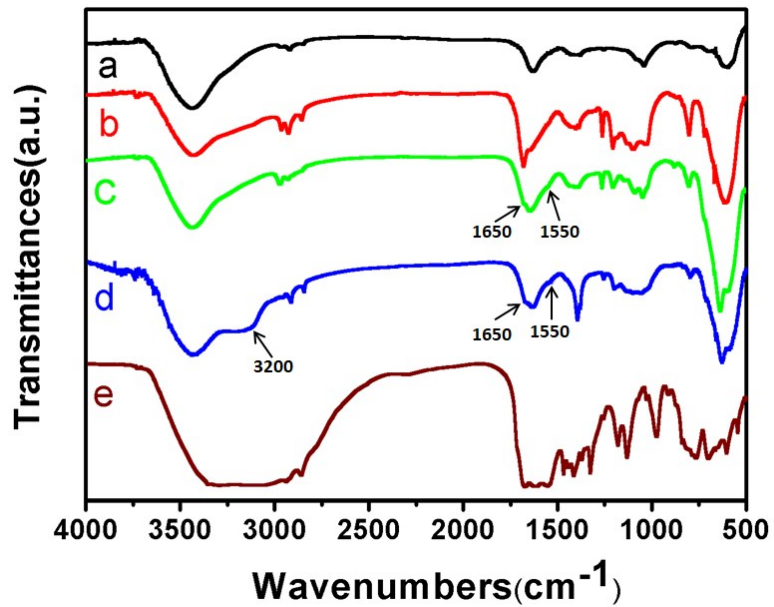

10 **Fig. S2** FTIR spectra of the (a) SPIOs, (b) SPIOs@PVP-PEI nanospheres, (c) SPIOs@PVP-PEI@MOF  
11 nanospheres, (d) the SPMA nanospheres, and (e) arginine.

12  
13  
14  
15  
16

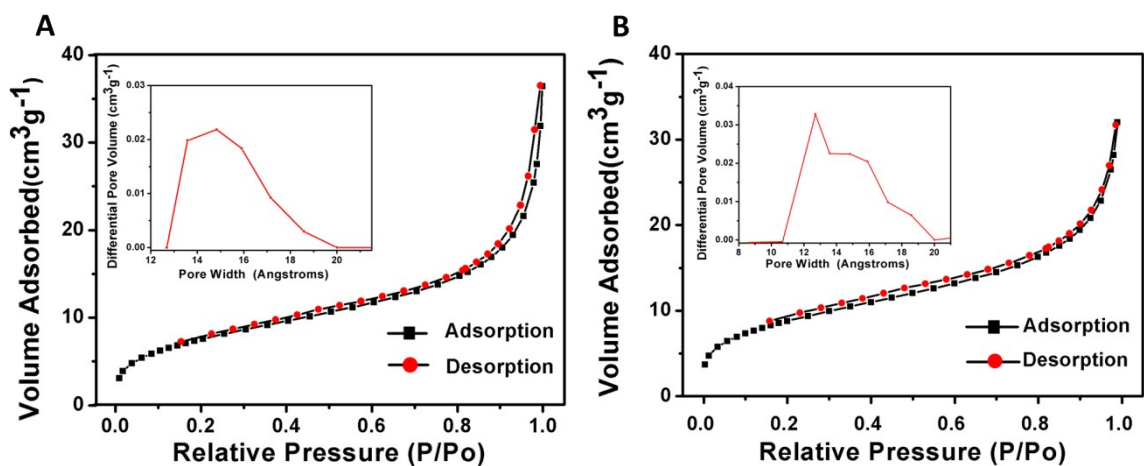

1  
 2 **Fig. S3** N<sub>2</sub> adsorption–desorption isotherm and pore size distribution (inset) of the (A) SPIOs@PVP-PEI@MOF  
 3 nanospheres, and (B) the SPMA nanospheres.

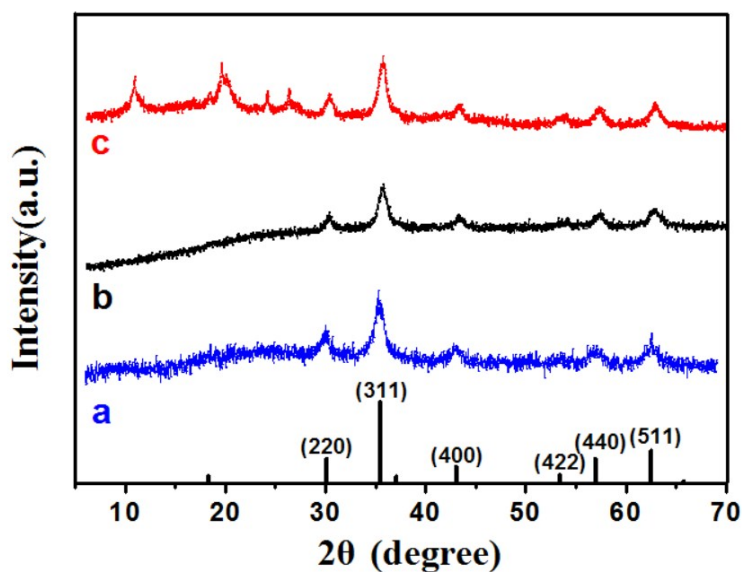

25 **Fig. S4** XRD patterns of (a) SPIOs, (b) SPIOs@PVP-PEI nanospheres, and (c) SPIOs@PVP-PEI@MOF  
 26 nanospheres. the standard XRD pattern of SPIOs (JCPDS no. 19-06290) is shown by solid bars.

1

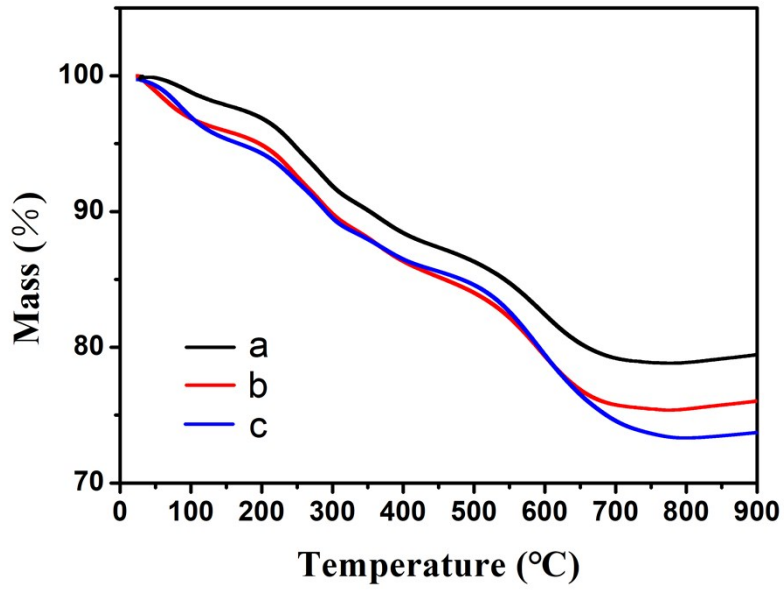

2 **Fig. S5** TGA curves of the (a) SPIOs, (b) SPIOs@PVP-PEI@MOF nanospheres, and (c) the SPMA nanospheres.

3

4

5

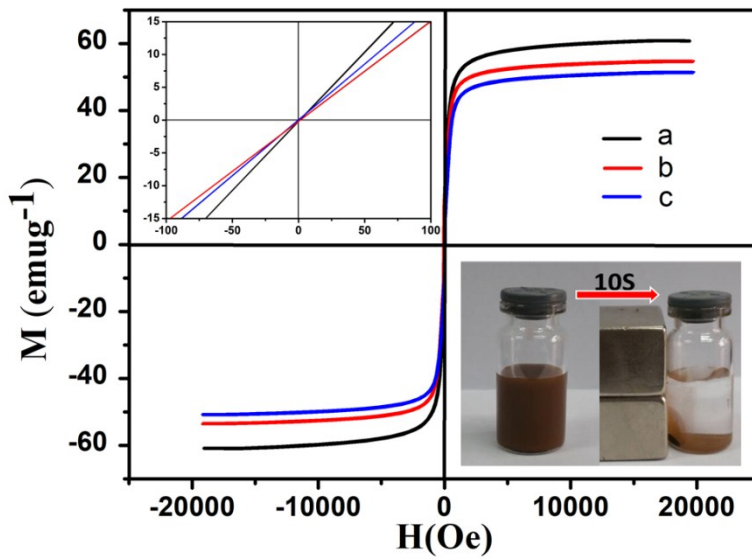

6 **Fig. S6** VSM curves of the (a) SPIOs, (b) SPIOs@PVP-PEI@MOF nanospheres, and (c) SPMA nanospheres, and  
7 dispersion and separation process of the SPMA nanospheres (inset).

8

9

10

11

12

13

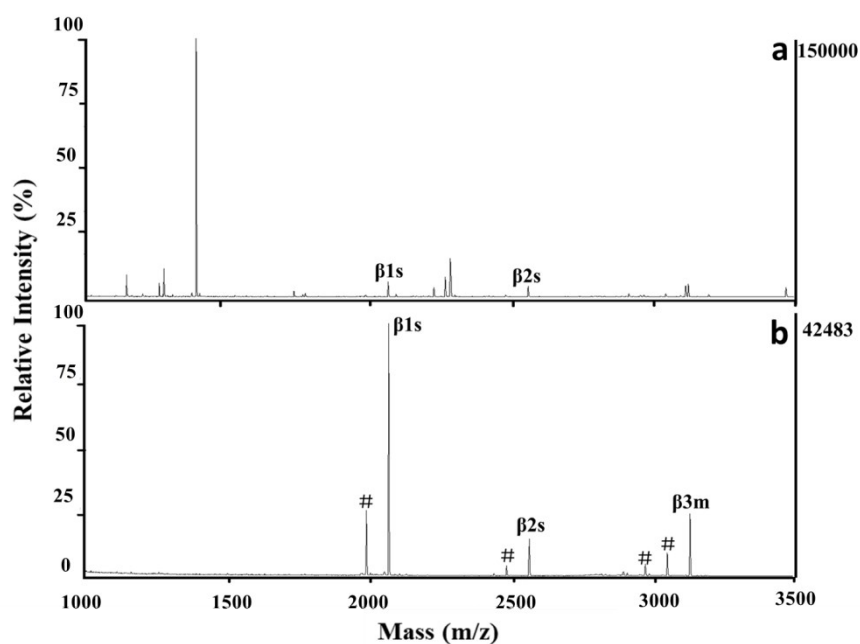

1 **Fig. S7** MALDI-TOF mass spectra of (a)  $\beta$ -casein digest ( $10^{-6}$  M) and (b)  $\beta$ -casein digest ( $10^{-6}$  M) after enrichment  
 2 with the SPMA nanospheres. (s, monophosphopeptide; m, multiphosphopeptide; #, dephosphorylated peptide).

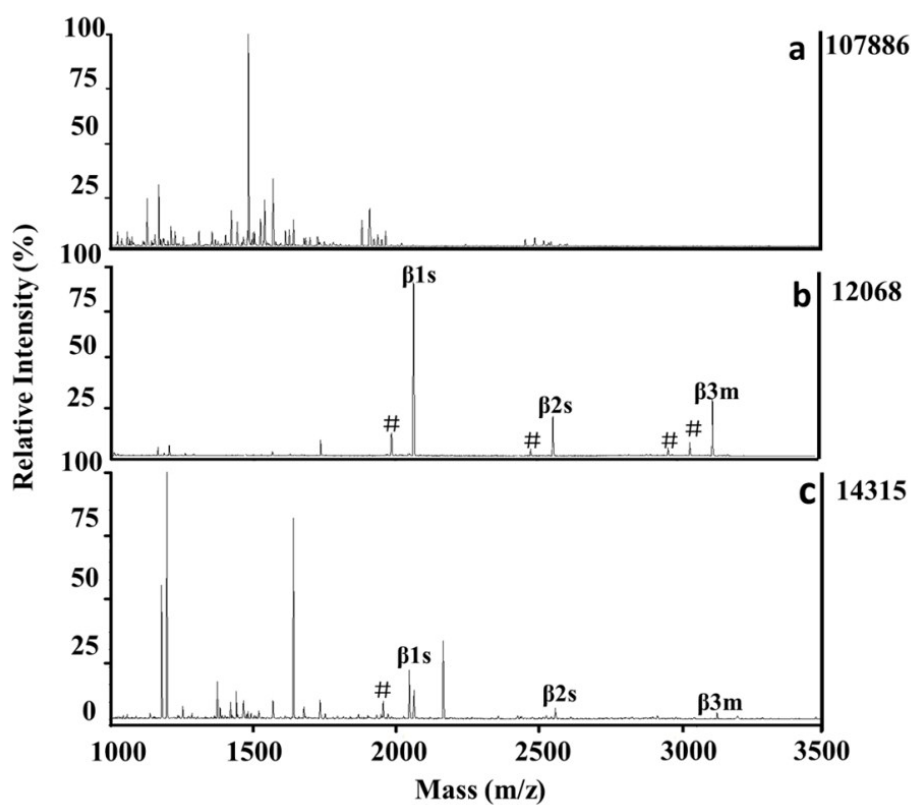

3 **Fig. S8** MALDI-TOF mass spectra of the tryptic digests mixture of  $\beta$ -casein and BSA (with a molar ratio of  $\beta$ -  
 4 casein to BSA of 1:100): (a) direct analysis, (b) analysis after enrichment by the SPMA nanospheres, and (c)  
 5 analysis after enrichment using the commercial  $\text{TiO}_2$  microspheres. (s, monophosphopeptide; m,  
 6 multiphosphopeptide; #, dephosphorylated peptide).



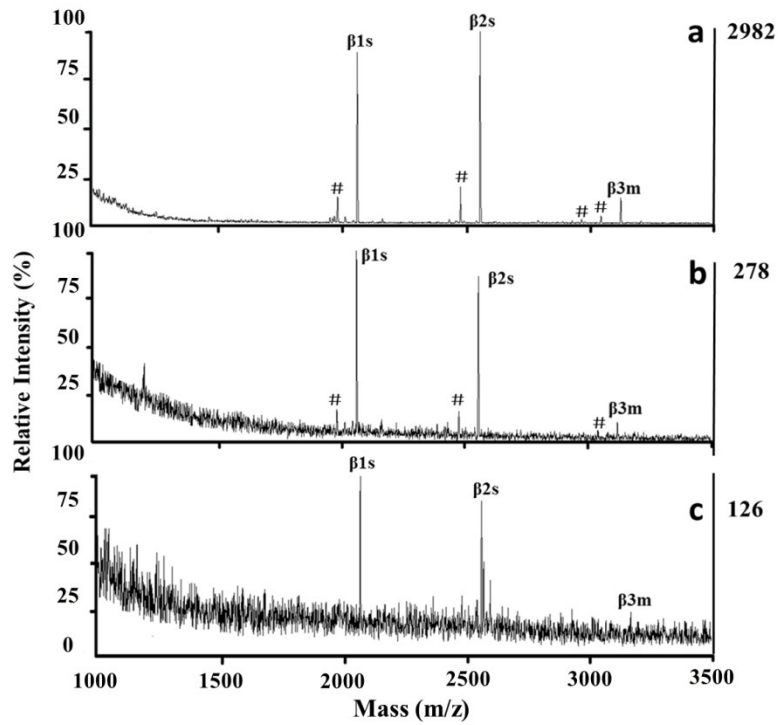

1 **Fig. S9** MALDI-TOF mass spectra of the tryptic digest mixture of  $\beta$ -casein with different concentrations after  
 2 enrichment with the SPMA nanospheres: (a)  $10^{-8}$  M, (b)  $10^{-9}$  M, and (c)  $10^{-10}$  M. (s, monophosphopeptide; m,  
 3 multiposphopeptide; #, dephosphorylated peptide).

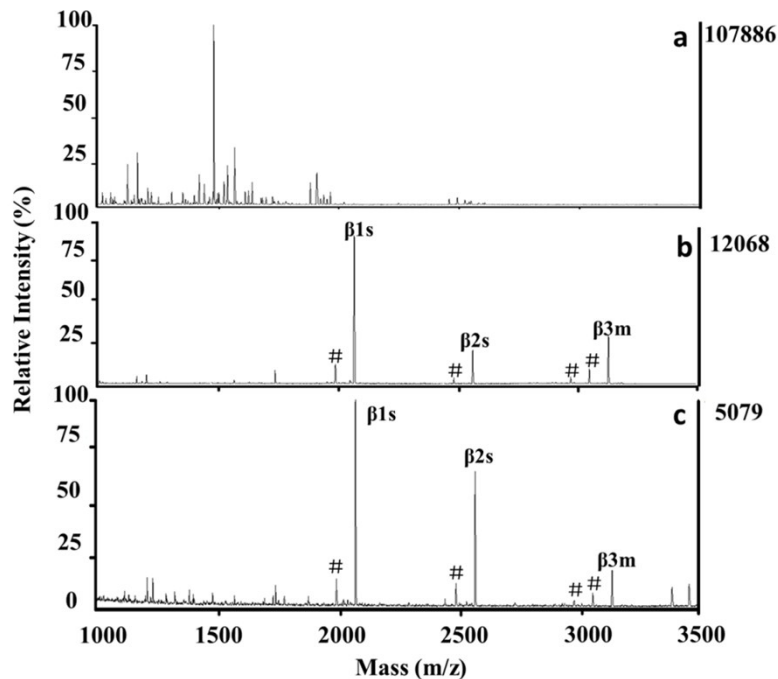

4 **Fig. S10** MALDI-TOF mass spectra of the tryptic digests mixture of  $\beta$ -casein and BSA (with a molar ratio of  $\beta$ -  
 5 casein to BSA of 1:100): (a) direct analysis, (b) analysis after enrichment by SPMA nanospheres. MALDI-TOF  
 6 mass spectra of the tryptic digests mixture of  $\beta$ -casein and BSA (with a molar ratio of  $\beta$ -casein to BSA of 1:1000):  
 7 (c) analysis after enrichment by SPMA nanospheres. (s, monophosphopeptide; m, multiposphopeptide; #,  
 8 dephosphorylated peptide).

1  
2  
3

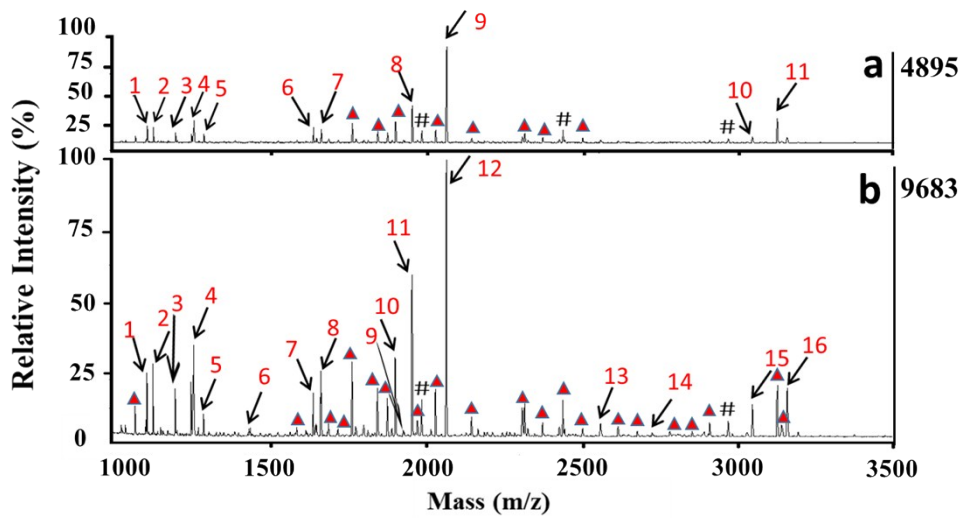

4 **Fig. S11** MALDI-TOF mass spectra of (a) digests of the non-fat milk after enrichment with SPIOs@NH<sub>2</sub>  
5 nanospheres and (b) SPIOs@PVP-PEI@MOF nanospheres. Phosphopeptide peaks identified are marked with  
6 numbers and non-phosphopeptide peaks are marked with symbol ▲. The dephosphorylated peptide peaks are  
7 marked with symbol #.

8  
9  
10

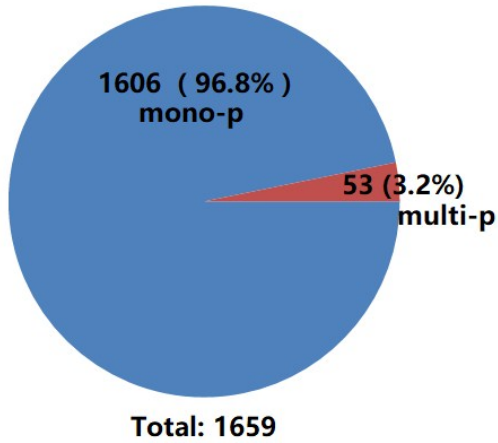

11 **Fig. S12** Number of identified phosphopeptides from tryptic digests of rat brain lysate after enrichment with the  
12 SPMA nanospheres. “P” represents phosphopeptide.

13  
14  
15  
16  
17  
18

1 **Table. S1** Detailed information for the observed phosphopeptides obtained from tryptic digests of  $\beta$ -casein after  
 2 enrichment by the SPMA nanospheres in MALDI-TOF MS analysis.

3

| No.        | Observed<br>m/z | Theoretical<br>m/z | Charge | Peptide sequence                  | Number of<br>phosphoryl groups | Reported<br>reference |
|------------|-----------------|--------------------|--------|-----------------------------------|--------------------------------|-----------------------|
| $\beta$ 1s | 2061.46         | 2061.83            | -2     | FQSEEQQTDELQDK                    | 1                              | 1 2 4 5               |
| $\beta$ 2s | 2555.48         | 2556.10            | -2     | FQSEEQQTDELQDKIHPF                | 1                              | 1 2 3 4 5             |
| $\beta$ 3m | 3121.38         | 3122.27            | -3     | RELEELNVPGEIVE <b>S</b> LSSEESITR | 4                              | 1 2 3 4 5             |

4

5 **S**: phosphorylated site.

6

7

8

9

10

11

12

13 **Table. S2** List of phosphopeptides from tryptic digests of proteins extracted from non-fat milk after enrichment by  
 14 the SPMA nanospheres in MALDI-TOF MS analysis.

15

| No. | Observed | Theoretical | Charge | Peptide sequence                                  | Number of<br>phosphoryl groups | Reported<br>reference |
|-----|----------|-------------|--------|---------------------------------------------------|--------------------------------|-----------------------|
| 1   | 1103.2   | 1103.4      | -1     | KFQSEEQQT                                         | 1                              | 2 3                   |
| 2   | 1123.8   | 1124.1      | -2     | KEKVNELSKDIGSESTEDQA                              | 3                              | 3                     |
| 3   | 1197.2   | 1197.5      | -1     | KNMAINPSKENL                                      | 1                              | 2                     |
| 4   | 1241.8   | 1241.3      | -1     | TIASGEPTSTPT                                      | 2                              | 2 3                   |
| 5   | 1281.6   | 1281.1      | -3     | RINKKIEKFQSEEQQTDELQDKIHPFAQTQS                   | 1                              | 3                     |
| 6   | 1455.3   | 1455.5      | -2     | LSKDIGSESTEDQA                                    | 2                              | 2                     |
| 7   | 1522.0   | 1521.9      | -3     | VVRNANEEYSIG <b>S</b> SEESA<br>ATEEVKITVDDKHYQKAL | 4                              | 3                     |
| 8   | 1561.5   | 1562.0      | -2     | RELEELNVPGEIVE <b>S</b> LSSEESITRI                | 4                              | 3                     |
| 9   | 1634.7   | 1634.0      | -1     | EDSPEVIESPPEIN                                    | 1                              | 2                     |
| 10  | 1661.0   | 1660.8      | -2     | VPQLEIVPNSAEER                                    | 1                              | 1 4 5                 |
| 11  | 1927.2   | 1927.7      | -2     | KDIGSESTEDQAMEDIKQ                                | 2                              | 1 2 4 5               |
| 12  | 1952.0   | 1952.0      | -2     | YKVPQLEIVPNSAEER                                  | 1                              | 1 2 4 5               |
| 13  | 2061.4   | 2061.8      | -2     | FQSEEQQTDELQDK                                    | 1                              | 1 2 4 5               |
| 14  | 2080.9   | 2080.3      | -2     | KKYKVPQLEIVPNSAEER                                | 1                              | 4 5                   |
| 15  | 2555.8   | 2556.1      | -2     | FQSEEQQTDELQDKIHPF                                | 1                              | 1 2 3 4 5             |
| 16  | 2704.0   | 2703.5      | -3     | QMEAE <b>S</b> LSSEIIVPNSVEQK                     | 5                              | 1 4                   |
| 17  | 2720.3   | 2720.9      | -3     | QMEAE <b>S</b> LSSEIIVPNSVEQK                     | 5                              | 1 4                   |
| 18  | 2965.3   | 2965.8      | -3     | ELEELNVPGEIVE <b>S</b> LSSEESITR                  | 4                              | 1 2 5                 |
| 19  | 3122.0   | 3122.3      | -3     | RELEELNVPGEIVE <b>S</b> LSSEESITR                 | 4                              | 1 2 3 4 5             |

16

17 **S**: phosphorylated site.

18

19

20

1 **Table. S3** Detailed information of the observed phosphopeptides obtained from tryptic digests of rat brain lysate.

| <b>Master Protein Accessions</b> | <b>Phosphopeptide sequence</b>                       | <b>Theoretical m/z</b> |
|----------------------------------|------------------------------------------------------|------------------------|
| D3ZDN9                           | SSLSYTNEERLLLEGMAASSSSSSAGGVSGSSVPGSGFSVS<br>DLAPPRK | 4879.20167             |
| Q9EPJ1                           | SAGGSAGPGGATGGGIGGGDEPGSPAQ GK                       | 2391.02085             |
| Q6TY19                           | FLLDLERDDTVGAAGGIVTAGGGLSASSGHRGHCFYR                | 3979.79464             |
| F1M3D2                           | LGDPDGTGEPSTPSGLGAGGDR                               | 2189.93466             |
| D3ZIQ9                           | SRGPFPGVSTDDSAVPPP GGAPHFHGHYRTGGGAMGLR              | 3982.63228             |
| G3V7X9                           | SAAEAVATSVLTQMASQR                                   | 1980.84975             |
| D3ZVD1                           | QPGTAQAQALGLAQLAAA VPTSR                             | 2380.14217             |
| A0A0G2K9C5                       | AEAAAAPAVAPGPAQGHVSPTPATTSPGEKGEAGTPVA<br>AGTAAAIPR  | 4507.22531             |
| Q9JKA7                           | GGGSGGAGGSS LGLHDSAEER                               | 2131.87888             |
| D3ZN76                           | SPDPEMV PQGSPVRHSPPEPR                               | 2376.08022             |
| Q5EIC4                           | NSSSPVSPASVPGQR                                      | 1549.70063             |
| A0A0G2K3Q5                       | SFESDAEDHKPLK                                        | 1582.67849             |
| D4A1D2                           | EKALDIDSDEEPEPKEQKPEEK                               | 2663.19714             |
| F1LRL9                           | ASAEGEATAVVSPGVTQAVVEEH CASPEEK                      | 3119.38748             |
| A0A140UHX6                       | KLSGLER                                              | 882.44446              |
| Q6MG07                           | SSPYGR                                               | 746.2869               |
| F1LST4; D3ZKD9                   | TPPKSPSASK                                           | 1159.4796              |
| A0A0G2JW90                       | YHGHSMSDPGVSYR                                       | 1688.6523              |
| F1M4A4                           | SGTSQEELR                                            | 1086.44631             |
| D3ZWV8                           | FTIDSDAISASSPEKEPQQPPGGDTDR                          | 2982.30004             |
| B1WC25                           | SPTGTPAR                                             | 866.37677              |
| Q5BJU3                           | RSLDEDEPPPSPLARYRPLHNAASHEGLAATSGSPPR                | 4108.90261             |
| Q6AY81                           | GPTSPTTPR                                            | 993.4401               |
| O08560                           | DPSPEAR                                              | 851.32949              |
| A0A0G2K5C6                       | AELEEMEETHPSDEEGEETKAESFYQK                          | 3268.30353             |
| P62957                           | YPDHLHISTSPC                                         | 1506.60831             |
| A0A0G2K498                       | EDDGTFGEYSDAEDHKPLK                                  | 2232.89688             |
| E9PST5                           | GLSPLSSTADTK                                         | 1256.57699             |
| Q4FZT2                           | QCEGITSPESSK                                         | 1402.5556              |
| A0A0G2K2M9                       | SRTSPVTR                                             | 983.46699              |
| D4A8V2                           | RTSPSPPAR                                            | 1048.49353             |
| M0R4V3                           | ATWGDGGDSSSNVVSK                                     | 1743.72215             |
| R9PXV2                           | LSMPQSAAVNTTPPHNR                                    | 1900.87352             |
| D4A6C5                           | SSSPEPVTHLK                                          | 1261.58241             |
| D3ZT20                           | EPSSPEAQK                                            | 1052.4296              |
| P09951                           | QASQAGPGPR                                           | 1048.45715             |
| D3ZWS0                           | VSPTGAAGR                                            | 895.40332              |

|            |                                                   |            |
|------------|---------------------------------------------------|------------|
| A0A0G2K2C0 | VAAGSGAGGGGGAGGGGGGGGGNRAGGGGAGGAGGG<br>GGGGGGGSR | 3120.30843 |
| D3ZGL1     | DAPLSPPAQK                                        | 1103.51327 |
| P10362     | IETQTQEEVRDSKENTEK                                | 2244.00274 |
| P62494     | ENDMSPSNVVIHVPPTTENKPK                            | 2724.26987 |
| Q5BJT1     | RHSMQTEQIR                                        | 1365.60931 |
| A0A0G2K6I5 | GFSEEQLR                                          | 1045.43502 |
| F1MAQ8     | QRSPIALPVK                                        | 1188.65004 |
| Q63092     | SATPATDGR                                         | 955.38807  |
| A0A0G2K6I3 | GDVTAEAAAGASPAKANGQXNGHVK                         | 2490.10789 |
| Q3MUI2     | EAAAAPAVAPGPAQPGHVSPTPATTSPGEK                    | 2924.32271 |
| F1LM42     | QPPISPTSK                                         | 1034.4918  |
| O88954     | LTGSQEVK                                          | 941.43395  |
| F1LM42     | QKEESPQGSEEK                                      | 1455.59991 |
| Q5M9G6     | LSPEPVAHR                                         | 1085.51394 |
| A0A0G2K7T6 | AAPQSPSVPK                                        | 1061.5027  |
| Q75Q39     | KTPEGR                                            | 767.34475  |
| A0A0G2K2M9 | HLSLGSPPGIK                                       | 1149.52998 |
| D3ZG21     | LSTSPATR                                          | 912.41864  |
| F1LRL9     | VISPLR                                            | 764.40662  |
| A0A0G2JVB6 | AGSRLSAEDR                                        | 1141.49974 |
| G3V7T1     | QASPVAFK                                          | 927.43356  |
| D4A720     | SGSIIGSR                                          | 856.39242  |
| A0A0G2K2F4 | HLCSPSDHR                                         | 1188.46158 |
| Q7TP42     | EDSKKEETPGTPK                                     | 1525.67816 |
| F1LMT5     | GSPGLTR                                           | 767.34475  |
| A0A0G2K9C5 | KAEAAAAPAVAPGPAQPGHVSPTPATTSPGEK                  | 3123.45479 |
| F1LNK0     | VAKPDLVHQEAVDKEESYESSGEHESLTMESLKPDEGK            | 4307.95375 |
| A0A0G2JV32 | VLTTSPSR                                          | 940.44994  |
| I7FKL4     | GLSLSR                                            | 712.33893  |
| O08618     | HSPPMVR                                           | 903.39065  |
| A0A0G2JVW0 | VLSWSSPVGSR                                       | 1254.58783 |
| Q5U318     | QPSEEEIHK                                         | 1152.51841 |
| A0A0G2JZ56 | ASPCLDR                                           | 898.34884  |
| G3V7M5     | QSPVSSPTR                                         | 1038.46157 |
| Q9JHU0     | EMGTPLADTPTRPVTR                                  | 1837.85139 |
| A0A0G2KA69 | ETESPEPEK                                         | 1226.48242 |
| P97879     | QTDAQPASSPK                                       | 1209.51472 |
| A0A0G2K9C5 | AEAAAAPAVAPGPAQPGHVSPTPATTSPGEK                   | 2995.35982 |
| Q6AYK3     | ATSPLPCK                                          | 953.4162   |
| D3ZQ55     | ESPHFYR                                           | 1015.40332 |
| F1LQN3     | EDLVCSAALHSPQESPVGK                               | 2103.94166 |

|                |                                |            |
|----------------|--------------------------------|------------|
| Q6AYA6         | LESPSER                        | 897.37135  |
| Q8CGU4         | RSSAASLGR                      | 984.46223  |
| Q5RKH1         | KKSPIVNER                      | 1150.598   |
| P11730         | QETVECLR                       | 1114.45985 |
| A0A0G2JV65     | VVSSIEQK                       | 969.46525  |
| P12839         | EGSSEKDEGEQEEEGETEAEEGEGEEAEAK | 3178.18632 |
| P54748         | QSPSPLEEEEPGGLGHPSLPDK         | 2348.0806  |
| D3ZZ44         | AVAAAAGSLKK                    | 1066.56564 |
| A0A0G2K2M9     | RVPSPTVPK                      | 1157.60784 |
| POC5Y8         | QHKDSPEILSR                    | 1389.65222 |
| A0A1B0GWS0     | RSSDGLSHEDLAK                  | 1581.69046 |
| Q6MGB4         | GKPSSEDEKEAGGLR                | 1639.73232 |
| Q672J3         | LSTPKER                        | 910.43937  |
| D3ZT07         | LATPEDK                        | 853.37029  |
| F1M3W5         | MKLDHELSDLR                    | 1452.65526 |
| F1M842         | NSVTEDSPQPPLPSVR               | 1802.83203 |
| Q56A26         | QSPTHEMNPRGAQEGHIYVK           | 2359.0649  |
| A0A0G2K9M4     | ISSPVR                         | 738.35458  |
| Q5M7V8; B1WC16 | SPEIHR                         | 818.35564  |
| D4A0A1         | EQSELSSELR                     | 1257.53585 |
| G3V849         | ASPDGSQTVR                     | 1097.46229 |
| Q63488         | ASDESLR                        | 857.34005  |
| M0R660         | GAAQNIPASTGAAK                 | 1449.70973 |
| Q9JHU0         | EMGTPLADTPTRPVTR               | 1821.85648 |
| F1M049         | GVSPVISEHR                     | 1160.54596 |
| F1M3D2         | YHSLGNISR                      | 1126.5041  |
| D3ZV52         | QVQQNSLHR                      | 1189.54736 |
| A0A0G2K2M9     | AVISPR                         | 722.35967  |
| A0A0G2JTR4     | DMSLKR                         | 829.36377  |
| Q63488         | ASDESLRK                       | 985.43502  |
| Q62950         | HAAPAPSAKSSPSK                 | 1415.66787 |
| I7FKL4         | SPLPSHAR                       | 944.43496  |
| Q9JKA9         | GEPQCSPEGPAPAR                 | 1364.53006 |
| A0A0G2K8R3     | ISINQTPGTK                     | 1138.55038 |
| F1M9F9         | NLSITSPPPGPAK                  | 1358.67156 |
| D4ABP4         | ASSPQTEPLPR                    | 1262.57766 |
| G3V8B6         | TVGTPIASVPGSTNTGTVPGPEK        | 2247.09043 |
| B2GUY4         | ESVGGSPQSK                     | 1055.4405  |
| A0A0G2K5C6     | AELEEMEETHPSDEEGEETKAESFYQK    | 3252.30862 |
| Q62950         | HAAPAPSAKSSPSK                 | 1495.6342  |
| E9PU01         | MSQPGSPSPK                     | 1095.45404 |
| Q5RKH1         | DASPINR                        | 852.36112  |

|            |                           |            |
|------------|---------------------------|------------|
| B2GV24     | KDEDSDDDESQSSHAGK         | 1814.67124 |
| A0A0G2K2M9 | LRDGSSTPSR                | 1125.50483 |
| B5DF41     | RTSPVSVR                  | 1078.54048 |
| D3ZTK0     | EDSDSGTGPAR               | 1228.44777 |
| F1LRZ7     | EEAKSPAEAKSPAEAK          | 1722.79459 |
| P04177     | QAEAVTSPR                 | 1038.46157 |
| A0A0G2KA95 | SLESDNEEK                 | 1130.42491 |
| P13596     | HTEPNETTPLTEPEK           | 1802.78442 |
| E9PT53     | LVSSSEK                   | 829.37029  |
| Q9JKS6     | FSPIQESR                  | 1043.45575 |
| F1MAF8     | LSPSWNPK                  | 1008.45502 |
| Q5GFD9     | NFTNSPEESAK               | 1303.5202  |
| F1M5M9     | IESPEKR                   | 938.43429  |
| Q925Q9     | ETTGESESGDSSSTK           | 1624.58578 |
| G3V746     | QSVMNSTATMNNTHSNILR       | 2296.02099 |
| P08081     | LQSEPEIR                  | 1138.514   |
| F1LRZ7     | SPVEVK                    | 738.34335  |
| D3ZT16     | GSPSVAGAR                 | 881.38767  |
| P06685     | LSLDELHR                  | 1062.49795 |
| Q5D023     | QPATPTR                   | 850.38186  |
| A0A0G2K376 | AESDLR                    | 867.36079  |
| B5DF62     | RESPPPAR                  | 1086.50918 |
| A0A0G2JZJ5 | GSEDSPPK                  | 896.33972  |
| Q66H62     | VTGSTSDPGSR               | 1143.46777 |
| D3ZHG4     | IVHSSPSSDGK               | 1193.51981 |
| Q8CH90     | SPPGPPGSR                 | 931.40332  |
| F1M2T7     | RDSPSHLEAR                | 1247.55284 |
| D3ZKG7     | IVPSPDDSK                 | 1037.45508 |
| D3ZY00     | GHTSPCGMK                 | 1054.38458 |
| E9PSN4     | EVSPEVVR                  | 994.4605   |
| P12839     | GSPSTVSSSYK               | 1179.49293 |
| F1LRZ7     | SPVTVK                    | 710.34843  |
| A0A0G2K2M9 | ALPQTPR                   | 862.41824  |
| G3V7G0     | VPGGSPR                   | 749.33418  |
| B2RYB3     | ASPSPPK                   | 860.39136  |
| D4A644     | GPTPTATGPR                | 1034.46665 |
| Q8CF97     | ESSPSHGLLK                | 1134.51908 |
| P82995     | ESDDKPEIEDVGSDEEEEEKKDGDK | 2931.17865 |
| A0A0G2JXT6 | DLLHAVHPESPSLK            | 1622.7938  |
| F1LRI7     | VQTPPTIQGQK               | 1474.73014 |
| Q9WTY2     | QASPSGTPTEADTTLLK         | 1893.88413 |
| F8WFH6     | DTDAYSDLSDGEK             | 1495.54721 |

|                |                             |            |
|----------------|-----------------------------|------------|
| P0C6S7         | LSSPAQSPSQK                 | 1209.55111 |
| F1LSM0         | NMDQGGGGSPR                 | 1155.42486 |
| Q4V898         | DVYLSPR                     | 929.41282  |
| B2RYB3         | VSVSPGR                     | 781.3604   |
| B2RYB3         | AASPSQSVR                   | 1079.48811 |
| D3ZEW7         | KSSGDGPDLR                  | 1111.47794 |
| A0A0G2K2M9     | ELSHSPPR                    | 1002.44044 |
| A0A0G2K5C6     | MASPPSPGPPSAAHTPFHQSPVEDK   | 2665.17524 |
| F1LQW8         | LPSPTK                      | 722.34843  |
| Q920Q0         | ENSAAPSPIRPHSTSPAK          | 1926.90693 |
| G3V8K2         | GETPVNSTMSIGQAR             | 1627.71456 |
| A0A0G2K4U4     | ATHPPSSTPPNPLLNR            | 1778.85852 |
| D4ABB2         | QDTGSYTPDTKPK               | 1517.65194 |
| D4A8V2         | YVLTSPR                     | 915.43356  |
| P46844         | FTASPLEEER                  | 1258.53512 |
| Q80Z30         | VDSFTDR                     | 919.3557   |
| G3V864         | AVHTSPTGGLGAR               | 1303.61544 |
| B1WBR5         | SPPRAKPR                    | 1085.56155 |
| A0A0G2K8M7     | HSISMPAMR                   | 1109.46316 |
| F1LST4; D3ZKD9 | SGYSSPGSPGTPGSR             | 1473.60058 |
| A0A0G2KAX2     | KSSPSSPAVR                  | 1095.51941 |
| F1LSM0         | VSDQNSPVLPK                 | 1263.59806 |
| A0A0G2JW90     | YGMGTSVER                   | 1079.42274 |
| D3ZGN7         | RASPIVR                     | 878.46078  |
| D4A1G8         | GASPVTPSSTPPPPTDPQLTK       | 2155.03186 |
| Q5QD51         | GLASPDR                     | 795.33966  |
| F1LM42         | ETIKVETPTDIHSEK             | 1806.8521  |
| F1LM42         | HSPVSPSSK                   | 1005.4401  |
| Q5XIR9         | RAPSPIPK                    | 945.49174  |
| Q6MFY6         | RPTTPGPTPTPPQPPDPSQPPPGPMQH | 2990.38663 |
| B2RYB3         | EKSPPEPSVR                  | 1447.68285 |
| D4ABZ4         | VAPGTGGPTPGRSPPAPTPAR       | 2020.99641 |
| A0A0G2K5C6     | DFQEDSWGETK                 | 1421.52568 |
| B2RYB3         | RASPSPPK                    | 1016.49247 |
| D4A1G8         | NGPSPTTPQTGPQK              | 1586.72103 |
| Q63803         | ISTASGDGR                   | 943.38807  |
| A0A0G2JW88     | DVSPSPETETAK                | 1340.56173 |
| D3ZKG7         | GLESPLKK                    | 951.49107  |
| F1SW39         | QSNASSDVEAEEK               | 1473.57409 |
| F1M4A4         | KTPSPVR                     | 864.43389  |
| A0A0G2JW88     | ELPPSPEK                    | 976.4387   |
| B2RZ79         | ELSAPAR                     | 823.37096  |



|                |                               |            |
|----------------|-------------------------------|------------|
| F1M1X9         | DESPVSHR                      | 1006.39897 |
| O88917         | SPPGGAHGSLK                   | 1087.4932  |
| G3V928         | HSLASTDEKR                    | 1223.54161 |
| A0A140TAG3     | RPLSPQSK                      | 992.49247  |
| Q5XHX3         | SPVISRPK                      | 963.50231  |
| Q9QXY2         | FSNVGLVHTSER                  | 1425.65222 |
| F1M2K6; F1M787 | SPSIDSIQK                     | 1054.48163 |
| F1MA98         | QTPQAPQSPR                    | 1189.53613 |
| A0A0G2K2M9     | REISSSPTSK                    | 1171.53546 |
| P10888         | LLSASQK                       | 826.40701  |
| F1LNK0         | ISTPER                        | 782.34441  |
| O35889         | YVLSSQHRPDISPTE               | 1964.92258 |
| E9PSN4         | NTEESSSPVRK                   | 1313.5733  |
| G3V9D7         | NMSPDLR                       | 912.36449  |
| A0A0G2JWV5     | GSGTASDDEFENLR                | 1577.61154 |
| F8WFS9         | AGTKSPAVSPSK                  | 1209.58749 |
| D3ZTG3         | DQTTSTTHINHISSVK              | 1848.84875 |
| F1LNK0         | VSIEETVAK                     | 1055.50203 |
| A0A0G2JWK6     | RPDSPGQDAPR                   | 1275.54775 |
| F1LN59         | FSPTMGR                       | 875.34812  |
| F1LM42         | NEKHSPVSPSAK                  | 1440.592   |
| G3V6M3         | GGQDDDDAETGLTEGEGEGEEKEPENLGK | 3214.27032 |
| P82995         | EVSDDEAEK                     | 1230.44095 |
| P63012         | MSESLDTADPAVTGAK              | 1672.71356 |
| F1LM42         | QSDSNASFLR                    | 1204.49941 |
| D3ZSY8         | AVGGAPSPPPPVR                 | 1281.63511 |
| F1LRL9         | FEDEGAGFEESSEAGDYEEK          | 2304.834   |
| A0A0G2K7S6     | VSPSPQESLSSSK                 | 1499.66251 |
| Q5QD51         | ESPDITNGPK                    | 1024.3983  |
| A0A0G2K670     | QTGSPGMIYSTR                  | 1377.58684 |
| A0A0G2JV19     | HTNPSSPSPGTR                  | 1317.55832 |
| A0A0G2JXK1     | LATGEPASPHDSLGHSLPPSPAK       | 2403.13403 |
| M0RD40         | RHTVGVADPR                    | 1187.5681  |
| A0A0G2JW88     | LATTVSAPDLK                   | 1195.597   |
| Q9QY02         | AKSPTPDGSER                   | 1224.52562 |
| Q924N5         | ESPSHGLELSAPEK                | 1560.69414 |
| F1M110         | GSPGGDLGAK                    | 938.3979   |
| F1M842         | LTTSEEERSPAKR                 | 1583.74249 |
| P63142         | IPSSPDLK                      | 936.44379  |
| P34064         | ITSPLMEPSSIEK                 | 1511.70629 |
| F1M2K6         | LYLQSPR                       | 956.46011  |
| F1LST4; D3ZKD9 | SPVVSGDTSR                    | 1181.51981 |

|            |                                       |            |
|------------|---------------------------------------|------------|
| G3XEV5     | QQGHDPVSPR                            | 1200.51573 |
| F1LWK7     | QLGESPR                               | 953.4088   |
| A0A096MJH0 | NTSMSPR                               | 872.33319  |
| D4A510     | SPSPSPTPEAK                           | 1177.51366 |
| A0A0G2JW65 | FSSPPPLAVSR                           | 1237.59767 |
| F1LQN3     | NEDASFPSTPEVK                         | 1597.67816 |
| Q62976     | GGYSTPQTLANR                          | 1344.59437 |
| Q9JKS6     | ISPEKPDQQK                            | 1377.64099 |
| F1LRZ7     | AKSPMKEEAK                            | 1198.55375 |
| F1M392     | ETDDIESPKR                            | 1269.53585 |
| F1LWT1     | ETETMNQATPAR                          | 1428.58249 |
| F1LM42     | HTPVSPSGK                             | 989.44519  |
| G3V6Y9     | HMSESPNR                              | 1037.38702 |
| Q5XI21     | LPNLASPSAEGPPRCPGAAPR                 | 2292.09548 |
| F1LM42     | HSPVSSIK                              | 934.43937  |
| D3ZGE6     | QTPPASPSQPAEDRPPSSPIYEDAAPLK          | 3123.46705 |
| Q9QXY2     | LPPSSPQK                              | 933.44412  |
| A0A0G2K8R3 | NFSPTPGYR                             | 1118.46665 |
| B2GV40     | ASPEAEEAAR                            | 1110.44631 |
| A9CMA6     | RSPPGPGVPRPPPR                        | 1546.80022 |
| Q5XIS7     | VLSPPHTK                              | 958.47576  |
| Q5U328     | GLSEDTTEETLK                          | 1402.59851 |
| M0R5H1     | SPPPPPPPR                             | 1118.53942 |
| Q62901     | ASPVNEDVR                             | 1066.45648 |
| A0A0G2K0V4 | LSPPHSPR                              | 970.45061  |
| F1LNK0     | ASQSPPAHEAGYSTLAQSYTSDHPSELPEEPSSPQER | 4144.80438 |
| Q5M821     | GGVGAPGSPSTPPTR                       | 1417.64713 |
| F1M3W5     | SDAFLSK                               | 847.35973  |
| P83868     | DWEDDSDEDMSNFDR                       | 1971.62224 |
| M0R697     | GSWVSPSR                              | 955.40332  |
| F1LN42     | HLGGSGSVVPGSPSLDR                     | 1701.79559 |
| D3ZGZ9     | AVSPTEPTR                             | 1134.51908 |
| P07936     | AAQPPTETAESSQAEEEEKEAVDEAKPK          | 2950.32011 |
| P61150     | EPSLHEIGEK                            | 1218.54021 |
| P13234     | RNSEETLK                              | 1056.47213 |
| F1LRZ7     | SPATVKSPVEAK                          | 1293.64501 |
| A0A0G2K6F1 | VGRPHSSPPR                            | 1169.55753 |
| Q64548     | REQDSPPMKPGVLDAIR                     | 2004.95725 |
| F1LNK0     | APHWTSASLTEAAAHPHSPEMK                | 2452.07514 |
| M0R3Z8     | HLDRSPESDRPR                          | 1544.69654 |
| Q63633     | GSPVSSSEGIK                           | 1137.51875 |
| A0A0G2JW65 | IGALDLTSSSSSPTTVHSPAASPPHTAVPESAPADR  | 3876.82875 |

|                |                                   |            |
|----------------|-----------------------------------|------------|
| D3ZBU7         | GIMAPPEIDKSPSEGDVAPPK             | 2215.03523 |
| A0A0G2K4X8     | GKTPEEIRK                         | 1137.56637 |
| F1LRL9         | QPGVQSPSR                         | 1035.4619  |
| F1LRZ7         | SPVEEVK                           | 867.38594  |
| M0R5E3         | EAGSPDLASSPR                      | 1363.58895 |
| D3ZTF0         | VALAAGSPTRPPPAR                   | 1540.79955 |
| Q08877         | SPPSPPTTQR                        | 1147.51433 |
| B2RYB3         | QRSPPVTK                          | 992.49247  |
| P15791         | ANVVTSPK                          | 895.42847  |
| A0A0G2K5C6     | HSPGVSKEDSEEQTVKPGPEEGTSEEGK      | 3034.31609 |
| Q64548         | GQEEQSPGLEDK                      | 1396.5628  |
| D3ZNK1         | QSPQLLPR                          | 1018.50812 |
| D4AAS1         | LSLGSPEER                         | 1025.46632 |
| F1LM42         | EISSPSPVK                         | 1110.50785 |
| P47819         | MTPPLPAR                          | 962.45292  |
| P26431         | LDSPTMSR                          | 1002.39619 |
| Q8VIL3         | GPALPPKSP                         | 943.46486  |
| F1MAK3         | AVSPEGDER                         | 1039.4092  |
| D3ZWH2         | EFSPSFQHR                         | 1214.49901 |
| F1LM42         | DSLESSPVEPK                       | 1267.54535 |
| D4A6K8         | ASSPTTGTAPR                       | 1125.49359 |
| G3V8K2         | MKGETPVNSTMSIGQAR                 | 1886.85001 |
| Q6MG49         | EDASPAGTTAEEAMSR                  | 1799.71535 |
| A0A0G2JSH4     | GEPNVSYICSR                       | 1361.55554 |
| Q6RKB3         | AAYLKDGSKPIVEMR                   | 1886.90818 |
| Q68FR9         | ATAPQTQHVSPMR                     | 1519.6723  |
| F1LRZ7         | SPAIAKSPASVK                      | 1331.56439 |
| P62997         | HSHSHSPMSTR                       | 1423.49739 |
| F1LQN3         | LPEDDEPPARPPPPAGASPLAEPAPPSTPAAPK | 3582.7516  |
| P13596         | HTEPNETTPLTEPEKGPVETK             | 2414.11229 |
| B2GV41         | EADEDSEPER                        | 1256.43145 |
| Q5QD51         | ASSSDDEGGPR                       | 1157.41065 |
| Q63638         | AASSEAPHHQPPESR                   | 1848.80247 |
| F1LRZ7         | RPADIRSPEQVK                      | 1475.73662 |
| B2RYB3         | YSPSPPK                           | 952.41758  |
| A0A0G2K9J0     | EYSPPPSPLR                        | 1319.60314 |
| F1LST4; D3ZKD9 | TPPKSPSASK                        | 1079.51327 |
| Q5XII9         | NASVPNLR                          | 950.44552  |
| A0A140TAG3     | LGVSVSPSR                         | 981.47649  |
| P31016         | RYSPPAK                           | 900.43389  |
| A0A0G2K2P5     | IDSPGLK                           | 809.38046  |
| D3ZWX4         | GTSAASASVMTPTSDHHLDTAVSR          | 2566.12394 |

|            |                               |            |
|------------|-------------------------------|------------|
| P29066     | GMKDDKDEEDDGTGSPHLNNR         | 2409.96129 |
| P06685     | EVSMDDHKLSLDELHR              | 2019.88415 |
| P54900     | EQKLSTDDLK                    | 1256.57699 |
| Q587K3     | HALGSPEK                      | 918.40807  |
| Q641X2     | MQNTDDEDR                     | 1203.39837 |
| Q08877     | RSPPPSPTTQR                   | 1303.61544 |
| Q62910     | VSAGRLTPESQSKPLETSK           | 2095.04309 |
| A0A0G2K5C6 | MASPPPSGPPSAAHTPFHQSPVEDKSEPR | 3118.40882 |
| D3ZIX4     | GASAASSPAPK                   | 1023.45067 |
| Q64548     | EQDSPPMKPGVLDAIR              | 1848.85614 |
| D4A198     | ALSPEGALR                     | 993.47649  |
| D3ZWA1     | VSTPEGR                       | 825.35022  |
| A0A0G2JV32 | GGHERPPSPGLR                  | 1339.62667 |
| Q3KR59     | LLSPTHEK                      | 1004.48124 |
| D3ZLQ8     | AVPIA VADEGESESEDDDLKPR       | 2422.06573 |
| F8WFH6     | DLESLSPR                      | 996.43977  |
| F1MAL5     | VTSPSGLK                      | 969.46525  |
| F1LP01     | GAITPPR                       | 791.38113  |
| G3V7X5     | AAGSKEHLPHTEWQGEGR            | 2197.97747 |
| A0A0G2JSM7 | GSEENLDETR                    | 1229.46817 |
| Q9JMC1     | AAVSPSERPR                    | 1246.59398 |
| Q5BKC9     | FVSFTSR                       | 923.40226  |
| B2RYB3     | APQTSSPPVVR                   | 1216.57218 |
| A0A096MJJ5 | VVSEENLR                      | 1025.46632 |
| Q9JM59     | KESLSESR                      | 1015.44558 |
| Q9QXY2     | SPPPPPPR                      | 924.43389  |
| F1LMS1     | HMQMSSQEALNK                  | 1483.60693 |
| D3ZT71     | SHTGEAIAAR                    | 1092.48336 |
| B2GUY4     | ECSLSPK                       | 900.35326  |
| P31016     | DWGSSSGSQGR                   | 1203.44262 |
| D3ZE17     | AAASVVSGPPVASDCASPGDSAR       | 2208.9591  |
| D3ZGN7     | GPSQVSSPSQPQK                 | 1503.68391 |
| P60203     | GQHQAHSLEK                    | 1242.53752 |
| D3ZQL8     | QASPTEVVER                    | 1195.53546 |
| G3V8B6     | TPDASPEPK                     | 1021.42378 |
| Q5M7V8     | ASVSDLSPR                     | 1011.45067 |
| Q8VHX0     | DLSPISK                       | 839.39103  |
| F1LNP8     | AGIPQHPPMAQNLQYPDDSDDEKK      | 2911.27166 |
| D4A2D3     | LISGDAEPTPEQEEK               | 1722.74697 |
| A0A0G2K0V4 | EAQELGSPEDR                   | 1310.52602 |
| F1LM42     | KGSSEESVDEDR                  | 1417.54787 |
| D3ZG21     | AGSSPTQGAQNEAPR               | 1550.65949 |

|            |                                    |            |
|------------|------------------------------------|------------|
| Q5U2P5     | EAGLSQSHDDLSNTTATPSVR              | 2265.99832 |
| B3DMA0     | KHSQTDLVSR                         | 1250.58889 |
| D3ZPJ0     | EHLLSPPR                           | 1028.49247 |
| F8WFS9     | NMGSPRPK                           | 966.42268  |
| A0A0G2KA20 | ALEQSHSLPLTPASTSPTK                | 2142.04784 |
| E9PSN4     | RSPERPTGDLR                        | 1363.6478  |
| P11507     | EFDELSPSAQR                        | 1358.5624  |
| F1LQI5     | HVTLPSSPR                          | 1073.51394 |
| Q6PCT3     | HSISMPVMR                          | 1137.49446 |
| Q9JKB0     | LGTPPGGGAAGK                       | 1062.49795 |
| F1LRL9     | SQGSTSNSDWMK                       | 1407.52464 |
| A0A0G2K7X3 | ATVTPSPVK                          | 979.48599  |
| F1LRL9     | ESVASGDDR                          | 1015.37281 |
| G3V953     | LERTPEKDK                          | 1195.57184 |
| A0A0G2K1Y8 | SLQQLAEER                          | 1153.52489 |
| Q9JMB3     | LSTSPVR                            | 839.40226  |
| P97526     | RQEMESGITTPPK                      | 1553.70293 |
| Q63796     | APPSPGR                            | 761.33418  |
| Q91Y79     | AESPPADAK                          | 965.39757  |
| A0A0G2JY08 | APSDDGSLK                          | 969.39248  |
| A0A0G2JVR0 | QAGSHSNSFR                         | 1170.46878 |
| Q4KLL0     | EPAISSQNSPEAR                      | 1465.63188 |
| A0A0G2KA27 | EPPSPQGR                           | 947.39824  |
| P13668     | DLSLEEIQK                          | 1154.53406 |
| D4A732     | LPPSPTR                            | 847.40735  |
| F1LP01     | KGSDKRPTLTDAK                      | 1496.74685 |
| B1WC16     | EVQSPEQVK                          | 1123.5031  |
| A0A0G2K670 | RSSLVITTK                          | 1084.5762  |
| A0A0G2K4T7 | ESTSSKSPPR                         | 1155.50416 |
| A0A0G2K0M8 | VPATSKPSPTPTPAGAASPLAAVAAPATEAPQAK | 3401.73523 |
| A0A0G2K0J4 | AESRPETPK                          | 1094.48778 |
| A0A0G2JY08 | FSHNYLSDSDTEAK                     | 1693.67414 |
| Q812E9     | EEQELHDIHSTR                       | 1573.66424 |
| D4A055     | ATHTSSSTPMTPLLGR                   | 1736.80371 |
| O70521     | LMHSPTGR                           | 978.42268  |
| P06686     | AGQENISVSKR                        | 1268.59946 |
| P60203     | GLSATVTGGQK                        | 1098.51908 |
| A0A0G2JZ34 | VISPGPNSQER                        | 1263.57291 |
| A0A0G2K5C6 | DLSPLNGSTVSCSPDR                   | 1881.80483 |
| P07936     | AGDAPSEEKKGEGDAAPSEEK              | 2181.91834 |
| I7FKL4     | NIVTPRTPPPSQGK                     | 1571.79413 |
| Q5U2R6     | HPASAQSSPSSTPHSSPK                 | 1869.8127  |

|            |                          |            |
|------------|--------------------------|------------|
| A0A0G2K2M9 | ERAPSPASR                | 1050.4728  |
| F1LY25     | ALHTCSPTK                | 1094.47002 |
| B1WC11     | GWSPPPEVR                | 1104.48739 |
| F1LNK0     | VAIIRTPPKSPATPK          | 1655.92442 |
| F1M7K7     | AGGGAGGSGGSGPSAILR       | 1508.68531 |
| B0VXR4     | LFSSSSPPPAK              | 1284.58716 |
| D4A3T0     | RPESAPAESSPSK            | 1422.62606 |
| A0A0G2K4Y7 | AISPTSATSSGR             | 1214.54127 |
| F1LRZ7     | SPSEAKSPAGAK             | 1209.55111 |
| Q71RJ2     | DASPVGVK                 | 852.38628  |
| P07936     | QADVPAAVTDAATTPAAEDAAK   | 2235.01766 |
| Q9WVR6     | GSDTSPEAEASSGGGGVALK     | 1856.79096 |
| F1M062     | ETESAPGSPR               | 1110.44631 |
| D4A1J3     | EAEGSPETEK               | 1156.44056 |
| Q02294     | IGSDPYLGQR               | 1185.52998 |
| F1LRL9     | RESVASGDDR               | 1171.47392 |
| A0A0G2K7T5 | GFSPPHR                  | 877.37163  |
| D4A0W4     | VLDKGSPPSSR              | 1319.63551 |
| P07936     | EGDGSATTDAAPATSPKAEEPSK  | 2296.98167 |
| A0A0G2JT06 | EGSQGELTPANSQSR          | 1640.69118 |
| F1LNK0     | LDTVLEKSEEHVDSK          | 1808.83137 |
| F1LUE2     | ESSDSTNTTIEDEDAK         | 1821.69097 |
| F1LNK0     | AGVIQTSTEHFSK            | 1571.71013 |
| A0A0G2JW88 | ESEGPSPTDAAPGPDVTLTK     | 2282.95479 |
| D4A3C2     | TVTVISPEDEQK             | 1425.65088 |
| P62024     | LSPPLPPK                 | 928.49035  |
| Q64542     | EAGHGSDKEEISK            | 1466.61589 |
| D3ZM69     | ASQPGPTAESQSSPHRR        | 1872.83483 |
| G3V6Y9     | ADIDQSPVSK               | 1139.49801 |
| D3ZAA9     | GIMESPIVR                | 1081.51116 |
| A0A0G2K7G7 | ISNAEPEPR                | 1092.47213 |
| F1LN49     | EPAPCVQQPTVEVNALQTGDKTPK | 2687.27462 |
| A0A0G2JZ27 | SIQTSPTEDR               | 1342.55223 |
| A0A0G2JU56 | VRPSSDLSNSTGQSPHHK       | 2013.91381 |
| F1LQW8     | EYEEIHSK                 | 1356.5719  |
| P07936     | EGDGSATTDAAPATSPK        | 1655.67962 |
| Q00972     | STSATDTHHVELAR           | 1604.70644 |
| D3ZUT8     | RLSGGAVPSASMTR           | 1485.68795 |
| A0A0G2JSV0 | TLSQSSESGTLPSPGHTMEVSC   | 2526.05241 |
| D3ZA84     | LDEGTPPEPK               | 1162.50276 |
| Q05175     | ETPAASEAPSSAAK           | 1396.59918 |
| D3ZV52     | ITPTELPK                 | 978.49074  |

|            |                           |            |
|------------|---------------------------|------------|
| Q05175     | AEGAGTEEEGTQK             | 1386.54206 |
| D3ZWQ0     | GLASSPPGGALRPR            | 1415.71549 |
| P12839     | VSGSPSSGFR                | 1060.44592 |
| O88778     | FSPIEEAK                  | 1000.4387  |
| Q07266     | LSSPVLHR                  | 988.49756  |
| A0A0G2JU11 | RSSFLNAK                  | 1002.47682 |
| P53987     | EDETSTDVDEKPK             | 1572.63127 |
| M0R8V0     | DHNLGSPPK                 | 1044.451   |
| D3ZZP8     | VGLQSPSVETR               | 1252.59331 |
| A0A0H2UHZ4 | EESDGEYDEFGR              | 1512.51624 |
| F1LST4     | ESPPQPPADDGSEEPGSETSDAK   | 2406.94568 |
| D4A4M0     | ETISAIDTSPK               | 1241.56609 |
| B1WBR5     | HQPAASPVVVR               | 1240.6198  |
| O88801     | ASHASPADTHLK              | 1314.58381 |
| D3ZHG4     | ASPELSPPR                 | 1130.52417 |
| A0A140TAG3 | MGSPKPER                  | 981.42234  |
| D3ZGN7     | QAVLFSPAHSFGAEEAKPPASITTK | 2711.34402 |
| F1LRL9     | DLTGQVSTPPVK              | 1321.63992 |
| D4A1G8     | VVQTSPSAR                 | 1024.4823  |
| D3ZD80     | ADEPSSPAEEKDEGGGK         | 1782.70656 |
| Q4VFZ4     | RSPSEDDKDER               | 1500.59622 |
| D3ZE26     | GSPHLLR                   | 859.41858  |
| Q8VHK7     | RAGDMLEDSPK               | 1298.54464 |
| F1LPM3     | EAPSPVPPPHVPPRPR          | 1809.91598 |
| P47942     | TVTPASSAK                 | 941.43395  |
| D4A2Q3     | KDHRPETPGIK               | 1357.66239 |
| D4A463     | RPSAPMAR                  | 965.43866  |
| Q6RKB3     | DGSKEPIVEMR               | 1340.59159 |
| A0A0G2JWM2 | KSPPPAK                   | 804.40153  |
| O88778     | LHSSPASPSLASK             | 1361.64607 |
| D4A0V6     | DSSLSAPSPKPGK             | 1350.63009 |
| O08719     | VQRPEDASGGSSPSGTSK        | 1826.79163 |
| Q6AYU3     | HASPEDIKK                 | 1104.50852 |
| F1M9V7     | KASPPSV                   | 765.35425  |
| B0LPN4     | DGPSPTSGSSK               | 1099.43033 |
| O08773     | EPGSSHGSPDTAR             | 1490.62713 |
| A0A0G2JVF2 | DGGESPTVLK                | 1082.47655 |
| P50232     | EAVSPESLK                 | 1039.47073 |
| D3ZDC2     | RLSVGSSMR                 | 1072.49691 |
| A0A0G2K8V2 | DPNASPGDAGEQAIR           | 1577.65916 |
| Q5RJL0     | EGSPLKEESLAR              | 1395.65155 |
| O35314     | EQSSQESGEETR              | 1446.53804 |

|            |                                     |            |
|------------|-------------------------------------|------------|
| D3Z9D0     | LITDSDGTYK                          | 1293.561   |
| A0A0G2JY10 | VEGIEGSPAEEAR                       | 1423.61008 |
| A0A0G2JUI5 | DGGAASPATEGR                        | 1168.46302 |
| F1LNK0     | DGSPDAPATPEK                        | 1264.5093  |
| A0A0G2KBC7 | GGTPSAFDR                           | 987.39315  |
| D4A5C4     | AMSIPTSPTR                          | 1140.51189 |
| P34058     | EISDDEAEEEKGEK                      | 1687.65821 |
| F1LM42     | VETPTDIHSEK                         | 1335.5828  |
| Q5QD51     | GPLEAPQDGEAEEGTSDGEK                | 2196.88162 |
| P12839     | SPVPKSPVEEVKPKPEAK                  | 2026.06203 |
| M0RDJ7     | AEDEGSTEEGGKADEKSDTEGKPAR           | 2788.14288 |
| Q7TP75     | VLHAQCHSTPDSAEDVRK                  | 2129.94339 |
| D3ZWX2     | VVITQSPGK                           | 1008.51254 |
| A0A0G2K7X3 | TSASPPLEK                           | 1009.46017 |
| A0A0G2K0F3 | FASPPGPQR                           | 1036.46117 |
| F1LRL9     | VQSLEGEKLSPK                        | 1394.69269 |
| O55007     | SATTTGSPGTEK                        | 1216.5093  |
| Q62910     | EFGGVGAPPSPGVTR                     | 1507.69408 |
| Q64350     | AGSPQLDDIR                          | 1151.50924 |
| B5DEK0     | LSMEDSKSPPPK                        | 1395.62256 |
| P63142     | IPSSPDLKK                           | 1064.53875 |
| Q9WU49     | GNVVPSPLPTR                         | 1216.60856 |
| D3ZCX6     | APDTVSVVKPSSPAR                     | 1590.78871 |
| G3V949     | VLLLEANRHSPGPER                     | 1767.89016 |
| P12839     | EVAKESPKEEK                         | 1353.62975 |
| O35095     | LLSTSPALQGTPASR                     | 1578.78871 |
| F1M4R7     | LCDTPCVSSPHAR                       | 1579.63929 |
| F1M1Y0     | VVTPPAASDIPADSPAPGPPGPPGSAGPPGPPGPR | 3214.55687 |
| F1LWN1     | QSGSPENWR                           | 1140.44698 |
| Q62747     | NSLETVGTDPDSGR                      | 1412.60533 |
| Q62952     | GSPTRPNPPVR                         | 1257.60996 |
| G3V8L3     | LSPSPTSQR                           | 1052.47722 |
| Q63633     | ESSPFINSTDTEK                       | 1534.63088 |
| B5DF41     | EEGTGESAGGSPAR                      | 1384.53764 |
| A0A0G2JX90 | GASAHTSPQTPPAR                      | 1457.65328 |
| Q4FZS1     | VDEKPSSPGDSSK                       | 1412.5941  |
| A0A0G2K8W9 | ESSPVPSPTSR                         | 1338.55732 |
| A0A0G2K0E5 | FYGGGGGGGSPGK                       | 1177.46738 |
| P49655     | VASPGGLR                            | 836.40259  |
| F1LQW8     | EGSIGGSGSGGGGGGLKPSITK              | 2053.955   |
| B2RYB3     | HRPSSPATPPPK                        | 1351.65183 |
| Q6QIX3     | VSQSGLSPER                          | 1139.50924 |



|            |                               |            |
|------------|-------------------------------|------------|
| Q5D059     | DYDDMSPR                      | 1078.35472 |
| D3ZRG7     | LNHSPPQSSSR                   | 1289.5634  |
| Q9QXY2     | SPNTAILIK                     | 1036.54384 |
| A0A0G2KA92 | LKDEHGLELSSPR                 | 1560.74176 |
| A0A0G2K0F3 | SEAEERGEVR                    | 1085.41467 |
| B1WC96     | IISRESAPIK                    | 1193.62897 |
| F1M6X3     | RSPSADQSLDDSPSK               | 1669.7065  |
| D4A0A1     | KESDDDSRPPHR                  | 1518.63328 |
| D3ZGE6     | KQTPPASPPQPAEDRPPSSPIYEDAAPLK | 3331.52834 |
| O54852     | HVSDPGLPGK                    | 1086.49795 |
| F1LMW7     | LSGFSFKK                      | 993.48051  |
| F7F350     | TPPVVIK                       | 833.45323  |
| D3ZGL5     | VPSPDHR                       | 887.37711  |
| D4A5J1     | ASAAEGSEASPPSLR               | 1509.65809 |
| P85845     | VNASASSLK                     | 956.44485  |
| A0A0G2QC21 | KPSDEEFAVR                    | 1257.55111 |
| G3V949     | IGFPSTSPAK                    | 1084.50745 |
| A8WCF8     | QGAGTPLR                      | 879.40841  |
| Q8VHW9     | DASPVGLK                      | 866.40193  |
| Q63624     | APSTPPPK                      | 874.40701  |
| F1M842     | MESLGSPR                      | 956.39071  |
| A0A0G2K7X3 | KTSASPPLEK                    | 1137.55513 |
| P58295     | LSSPQAQATSAALR                | 1480.71555 |
| A0A0G2K2B3 | VQISPDSGGLPER                 | 1434.66245 |
| Q9JIR4     | NDGSQSDTAVGTVGAGGK            | 1700.71231 |
| Q498D5     | VTVHQVSPQHR                   | 1367.65797 |
| A0A0G2JWK2 | MPFQASPGGK                    | 1099.46421 |
| P85845     | VNASASSLKK                    | 1084.53982 |
| D3ZLD5     | VFKEEGSPDR                    | 1243.53546 |
| P12839     | SPVKSPEAK                     | 1022.4918  |
| O55007     | RGSSPGSLEIPK                  | 1307.63551 |
| D4A4W6     | VLHGAQTSDEEKDF                | 1655.69487 |
| G3V8D6     | ALRPGDLPPSPDDVKR              | 1812.90039 |
| F1LM42     | HSPVSPSAK                     | 989.44519  |
| P49620     | QETPDHPK                      | 1031.41937 |
| D3ZML2     | VTPHPSPR                      | 970.45061  |
| D3ZU55     | EGSPIHPDPLGSK                 | 1528.66793 |
| F1LNK0     | VTSEPEAVSEK                   | 1255.54535 |
| Q5M7V8     | ERSPALK                       | 880.42881  |
| A0A0G2K1Y8 | KLDPAQASASR                   | 1152.54088 |
| B1WC16     | QKSPEIHR                      | 1074.50918 |
| F1M0J7     | YTEDMTPTEQTPR                 | 1648.65604 |

|            |                               |            |
|------------|-------------------------------|------------|
| P61150     | KSSGTPTMNGGK                  | 1244.53408 |
| Q75Q39     | ASPALGSGPDGSGDSLEMSSLDLDR     | 2301.95408 |
| P26431     | LDSPTMSR                      | 986.40127  |
| A0A0G2K598 | VQNSPPVGR                     | 1033.48264 |
| A0A0H2UHB7 | KGSLDSDNDDEKDPQHSLNATHHADK    | 2954.25483 |
| F1LRZ7     | SPAEVKSPAEVK                  | 1321.63992 |
| A0A140TAF2 | NCPSPMQTGAATDDSK              | 1759.66629 |
| G3V8F3     | HDTDPDPSPPR                   | 1198.48884 |
| F1LRL9     | SDISPLTPR                     | 1065.49762 |
| I7FKL4     | HRDTGILDSIGR                  | 1419.67402 |
| Q66HA8     | IESPKLER                      | 1051.51835 |
| D3ZU13     | AASLTEDR                      | 942.39282  |
| F1M3W5     | QLDHESDDADREDDER              | 2024.74653 |
| F1LQN3     | KLPSDTEKEDR                   | 1397.63082 |
| P12839     | EEEPEVEKSPVKSPK               | 2071.88724 |
| O35458     | GGAPLPPSGSK                   | 1047.48705 |
| Q62910     | EMEAPKSPGTAR                  | 1353.58684 |
| D3ZSZ6     | VPLHLESPHEER                  | 1522.70498 |
| G3V8D6     | REDSPGPEVQPMDK                | 1680.69349 |
| A0A0G2KAT5 | LQPQEISPPPTANLDR              | 1855.89497 |
| G3V7G0     | KPASVSPPTPPSPTEGEAS           | 1919.86339 |
| F1LRL9     | VESKPSVTEK                    | 1183.56061 |
| Q9JKM5     | SPSAVGPSSGGLR                 | 1221.56234 |
| A0A0U1RRU0 | AHTPSGDEQER                   | 1306.50595 |
| D4AE85     | GTGPPSPTKDR                   | 1192.53579 |
| D3Z9Z0     | GPPESDSPK                     | 993.39248  |
| Q920Q0     | SPGGSTMMK                     | 975.36753  |
| A0A0G2JUR5 | AATEALGEKSPEGTTVSGYDIMK       | 2435.10476 |
| P70566     | KFSLAATR                      | 973.48666  |
| P13668     | DLSLEEIQKK                    | 1282.62902 |
| D3ZMD4     | HPHPGSSPEMLPK                 | 1493.66068 |
| F1LMW7     | VNGDASPAAAEPGAK               | 1434.62606 |
| Q3ZB99     | DGSPPPAFKPEPPK                | 1543.71924 |
| A0A0G2JZB4 | DGLAPEKTSPDR                  | 1365.6046  |
| P11505     | NSSPPSPNK                     | 1104.47213 |
| D3ZUT8     | LSGGAVPSASMTR                 | 1313.59193 |
| Q5XIA2     | ILGSASPEEEQEKPIILDRPTR        | 2445.20211 |
| P09951     | QASISGPAPPK                   | 1132.53982 |
| Q5EBD0     | LNQQGTVTPK                    | 1165.56128 |
| F7FF45     | AAQLQGSPAPEK                  | 1276.59331 |
| D3ZGE6     | KQTPPASPPQPAEDRPPSSPIYEDAAPLK | 3251.56201 |
| E9PT53     | LNATTSLEQDK                   | 1299.5828  |

|            |                               |            |
|------------|-------------------------------|------------|
| F1LMW7     | AEDGAAPSPSETPK                | 1523.62612 |
| A0A0G2K4A0 | EPTQKPSHPVKPLTAAPVEASPRK      | 2857.46078 |
| A0A0H2UHQ9 | VASLSPAR                      | 880.42881  |
| D3ZU00     | EMAPQSVSPR                    | 1181.50205 |
| A0A0G2K2B3 | GSPQQIDHAK                    | 1160.50958 |
| D4A0F5     | SPLAQMEEER                    | 1269.51809 |
| A0A0G2K7X3 | EEDEEAESPPEKK                 | 1596.63127 |
| P52481     | EEPSPSR                       | 881.34005  |
| G3V662     | ASEKDIAVSK                    | 1127.5344  |
| I7FKL4     | TPPPSQGK                      | 891.39717  |
| Q156J1     | VSSAPIPCSPGPAPSAVPSSPK        | 2267.07776 |
| F1LM42     | NEKHSPVSPSAK                  | 1360.62567 |
| A0A0G2K0F3 | ETDPSPEER                     | 1139.42524 |
| Q63622     | HYPVECDK                      | 1214.45477 |
| G3V7X5     | GEESQEQPVSDSHQQDESGK          | 2408.94741 |
| A0A0G2K7Y2 | TTTPDVVHPK                    | 1174.55038 |
| D4A3T4     | GPNGHSPGVR                    | 1057.45748 |
| F1LNK0     | SEVQAHSR                      | 1177.49974 |
| A0A0G2JVM6 | QAAQATGSPHTSPTHGGGR           | 1897.83008 |
| F1LNT1     | RDSVLAASR                     | 1054.5041  |
| Q920Q0     | EENQTGPTTTPSDTQDLDMK          | 2287.92719 |
| Q3MUI2     | EAAAAPAVAPGPAQPGHVSPTPATTSPGK | 2844.35638 |
| F1LNJ2     | EEASDDDMEGDEAVVR              | 1846.66846 |
| F1LMD9     | DPETGVDNTSPK                  | 1339.54133 |
| F1LN69     | LDSSPVLSPGNK                  | 1293.60862 |
| F1M2K6     | VASPSQGQVGS SSPK              | 1495.67883 |
| Q7TQ77     | LNQSDSIEDPNPAGR               | 1779.75451 |
| G3V8D6     | SPGGPGSHVR                    | 1030.44658 |
| P19836     | QSPSSSP THER                  | 1292.52668 |
| Q91Z79     | LAPPSPAR                      | 888.43389  |
| O55007     | GSSPGSLEIPK                   | 1151.5344  |
| A0A0H2UHB7 | GSLDSDNDDEKDPQHSLNATHHADK     | 2826.15986 |
| A0A0G2K670 | MYPESTTGSPAR                  | 1376.55521 |
| A0A096MKC0 | WRPHSPDGPR                    | 1284.56335 |
| A0A0G2K5C6 | CLSPDDSTVK                    | 1201.48065 |
| Q9JMB3     | QLEYQQFEDDKLSQK               | 1978.87938 |
| Q6AXS5     | SKSEEHAEDSVMDHHR              | 2191.88627 |
| F1LQZ9     | GQSPTAPGPPK                   | 1116.50852 |
| F1M3W5     | MKLDHELSDR                    | 1436.66034 |
| D3ZM62     | SADVSP TTEGVK                 | 1270.55625 |
| Q712U5     | VTSPEKAEEAK                   | 1268.57699 |
| Q5M821     | VGTITSTPNR                    | 1125.52998 |

|                |                                |            |
|----------------|--------------------------------|------------|
| A0A0G2K7Y2     | VVSTSEEEEEAFTEK                | 1751.7259  |
| G3V8F3         | HDSDASPPR                      | 1061.40478 |
| G3V9E4         | ALDISASDEMARP                  | 1698.74044 |
| F1LU68         | ASPPVPSLVGTSGPR                | 1501.74103 |
| G3V9W0         | MSPKPELTEEK                    | 1496.67024 |
| D4A4M0         | ETISAIDTSPKENTPVR              | 1937.92158 |
| D3ZYS1         | HSAPSPVSVGSEEHPSVLK            | 2258.06014 |
| D4AEC2         | EHHTAEAPGGQKSPSK               | 1740.7701  |
| O88778         | IADSSVQTDDEEGEGR               | 1787.69672 |
| D3ZE26         | ERSPEMHR                       | 1121.45577 |
| F1LVS1         | RSSPLPAK                       | 935.47101  |
| Q6AY57         | GAYVPSSPTR                     | 1114.49287 |
| D3ZH75         | AATATRPPGPPAPQPPSPAPSSPPRPALAR | 3087.58878 |
| Q6S3A0         | RASFAEK                        | 888.39751  |
| F1M8X9         | ADAPDAGAQSDSELPSYHQNDVSLDR     | 2838.18501 |
| A0A0G2K1L4     | APSQAAESSPTK                   | 1253.54094 |
| P19836; G3V7M5 | MLQAISPK                       | 967.46823  |
| D3ZV52         | LLSPGTSK                       | 882.43323  |
| D3Z9C0         | GFSQYGVSGSPTK                  | 1394.59879 |
| B4F786         | GTGRPNPQR                      | 1149.51606 |
| D3ZWQ8         | EIKPSEPLSPK                    | 1460.75087 |
| G3V7U4         | ASAPATPLSPTR                   | 1248.59839 |
| Q5U2P5         | LDSPSRSPSKVEVTEK               | 1838.88955 |
| P97838         | ERLDSVDR                       | 1156.49941 |
| B2RYJ6         | DARPASPAGIPK                   | 1259.61438 |
| F1MAQ7         | ESDETVTVALSPK                  | 1455.66145 |
| E9PTI6         | GRLSPVPVPR                     | 1157.61907 |
| F1MAF1         | VKEEPPSPPHSPR                  | 1536.72063 |
| P68403         | QPVELTPTDK                     | 1207.56061 |
| F1LRZ7         | EGAKSLAEAK                     | 1083.50818 |
| P54287         | GEEHSPLER                      | 1133.46229 |
| D4ABT8         | SGDETPGSEAPGDK                 | 1426.53697 |
| A0A0G2K7S6     | AGNESPVQELR                    | 1279.56782 |
| O08678         | RDPSEGEASGR                    | 1240.49538 |
| M0R3M4         | LNSNNSASPHR                    | 1276.543   |
| Q9JIR4         | VSPPESTR                       | 948.41864  |
| G3V792         | ETQTPLATHQSEEEDEEMVEPK         | 2881.1605  |
| P09951         | GSHSQTSPGALPLGR                | 1641.77446 |
| A0A0G2K2V3     | SPSHDSLTK                      | 1138.47761 |
| O88989         | KLSSAMSAK                      | 1089.50099 |
| M0R462         | RPAATDSPKPSAK                  | 1405.68352 |
| A0A0G2K7X3     | NSQEDSEDSEEKDVK                | 1818.6913  |

|                           |                                |            |
|---------------------------|--------------------------------|------------|
| D3ZT71                    | KSHTGEAIAAR                    | 1220.57833 |
| A0A0G2K8W9                | AQTLPTSVVTTITSESSPGKR          | 2139.0693  |
| D3ZTF1                    | MLGEDSDEEDEADTTAGK             | 1992.72637 |
| F1LR98                    | LAEMYGGGESDKDA                 | 1522.57673 |
| F1LQX4                    | HSVTDKRDSEEESESTAL             | 2099.87648 |
| Q4V8C3                    | KPSASLPSPSGSR                  | 1350.64132 |
| A0A096MJT6                | YTAGSASPTPTFK                  | 1407.61919 |
| F1LR60                    | QDISPTR                        | 896.38734  |
| F7DLY1                    | YWGPASPTHK                     | 1223.5245  |
| A0A0G2K2M9                | DKFSPTQDRPESSTVLK              | 2014.94813 |
| P10362                    | EHLGQGSSQEMEK                  | 1555.60943 |
| F1LNK0                    | EASPPSSADK                     | 1068.42451 |
| A0A0G2K5C6                | ADSVEQQDGAALEK                 | 1540.65267 |
| Q99PJ8                    | EKDPHRPLSPTER                  | 1641.77446 |
| D3ZC56                    | LLDPEDVDVSSPDEK                | 1737.74663 |
| D3ZKQ4                    | NISLSSEEEAEGLAGHPR             | 1975.87569 |
| Q9WTW1                    | LKSSPPPLEPR                    | 1300.66608 |
| F8WFS9                    | SPSTESQLASK                    | 1214.53004 |
| P06687; P06685;<br>P06686 | QGAIVAVTGDGVNDSPALKK           | 2020.01106 |
| D3ZXQ2                    | HPLLSPGGPQSPLR                 | 1535.773   |
| D3ZH78                    | AVATSPSLEAPK                   | 1250.60281 |
| O35814                    | HDSPEDVKR                      | 1162.48884 |
| P62909                    | DEILPTTPISEQK                  | 1550.73495 |
| F1M3W5                    | LDHELSDR                       | 1177.52489 |
| F1LM42                    | SPGAPSIR                       | 864.39751  |
| D3ZKQ4                    | EDLSDVTDEDTGPAQPPPSK           | 2274.96496 |
| I7FKL4                    | GAYDAQGTLK                     | 1190.50891 |
| Q6S3A0                    | AQLEPVASPAK                    | 1190.58168 |
| Q9JJ19                    | EALVEPASESPRALAR               | 1872.92152 |
| Q9JM15                    | RSLTNSHLEK                     | 1264.60454 |
| B4F7E7                    | NLGLASPEEHPK                   | 1371.63042 |
| A0A0G2K4U6                | RPMEEDGEEKSPSK                 | 1698.70406 |
| A0A0G2K613                | LSGLSFKR                       | 987.50231  |
| Q5BJT1                    | RNTAPEAQESGLPSGLR              | 1862.87563 |
| Q63622                    | GPELVHVSEK                     | 1174.55038 |
| F1LP01                    | FPHSSPNVK                      | 1092.48739 |
| A2VD09                    | LGSQHSPGR                      | 1018.44658 |
| A0A0U1RRV0                | GKVESPPAAR                     | 1091.5245  |
| P17425                    | RPSTNDHSLDEGVGLVHSNTATEHIPSPAK | 3246.51752 |
| P97837                    | IMESPERK                       | 1069.47477 |
| F1LMT5                    | KGSPGLTR                       | 895.43971  |

|                           |                                    |            |
|---------------------------|------------------------------------|------------|
| B2RZ74                    | YDERPGPSPLPHR                      | 1600.72678 |
| P07323                    | YDLDFKSPADPSR                      | 1590.68358 |
| B2GUY4                    | DSSVPGSPSNIVAK                     | 1437.66212 |
| B0BNB2                    | LTVENSPK                           | 967.4496   |
| P12839                    | AKSPVPKSPVEEVKPKPEAK               | 2305.16044 |
| Q9WU49                    | DRSPSPLR                           | 1007.46699 |
| A0A0G2K2V4                | LADSPSR                            | 825.35022  |
| P13596;<br>A0A0G2K0M8     | DESKEPIVEVR                        | 1380.64065 |
| A0A0G2K9L2                | AAETVPDLSPSPTEAPAPASNTSNR          | 2570.17702 |
| F1LQW8                    | LSQSGSSITAAGMR                     | 1502.66688 |
| P97879                    | RQSIPEEFK                          | 1213.56128 |
| A0A0G2JTK6                | HAELSGSPLK                         | 1118.52417 |
| Q920Q0                    | SETMVNAQQTPLGTPK                   | 1781.81394 |
| D4A3T3                    | ADSDSEDKGEESKPK                    | 1701.6851  |
| D3ZWA1                    | VTASPELAEAAAGR                     | 1422.66245 |
| A0A0G2K8P5                | DASLEELQK                          | 1112.48711 |
| E9PTG1                    | GRPPAEKLSPPPK                      | 1567.79922 |
| F1M9G6                    | ASDPQSPQVSR                        | 1348.58929 |
| A0A0G2JSM7                | EKSPPDQSAVNPSTPPVK                 | 2156.02711 |
| A0A0G2JYH1                | RLSEQLAHTPTAFK                     | 1678.83125 |
| Q9QXY2                    | GEPDPERSPPMLSADDAEYPR              | 2496.03847 |
| Q9Z0G8                    | APSVSPVPPTK                        | 1256.62863 |
| Q5FV14                    | ADPVLLNNHNSLNKPAPTVPAAAPSSPDTTSEPK | 3345.63624 |
| F1M1Y0                    | EKDTDSTGSPDR                       | 1387.53731 |
| F1M5M9                    | SGGDTHSPPR                         | 1090.43133 |
| Q03555                    | LSTASCPTPK                         | 1141.4959  |
| B1WC16                    | AEGEPQESPLK                        | 1393.58828 |
| D3ZSY8                    | ASPVPGPTPTR                        | 1216.57218 |
| D4A3D9                    | GSSAAAPGSPPPGR                     | 1385.62092 |
| D3ZJ86                    | VGVDSDQEHLGVPDNER                  | 1945.82874 |
| A0A0G2JY03                | QVQEAIAGISSAAQATSPTDEAK            | 2353.09189 |
| Q9JKL8                    | DGASPSSESGPSR                      | 1283.48997 |
| Q63092                    | AAATPEPAVAQPDSTALEGATGQAPPSSK      | 2800.30367 |
| G3V8D6                    | VKSPGGPGSHVR                       | 1257.60996 |
| Q9Z0U4                    | HPPTPPDPSGGLPR                     | 1504.69442 |
| A0A0G2K548                | ADSAGSPDSSSAEK                     | 1388.52132 |
| M0R5U4                    | GQGTASPGSVSDLAQTVK                 | 1782.82695 |
| D3ZCJ3                    | VAILTDDEEEQK                       | 1469.64071 |
| A0A0G2JSM7                | AAVVTSPPTTAPHK                     | 1553.77233 |
| P06687; P06685;<br>P06686 | VDNSSLTGESEPQTR                    | 1699.71706 |
| F1LPA3                    | VQTPQSPHQHPVAPGAVADK               | 2144.02844 |

|            |                           |            |
|------------|---------------------------|------------|
| D3ZVQ0     | SAADSISESVVPGPK           | 1523.6989  |
| D4A4T0     | LGTGGGGSPDK               | 1025.42993 |
| A0A0G2K5C6 | ETSPTRGEPVGGQK            | 1522.68973 |
| A0A0G2JUZO | GPSPTHSAAPPVHTSV          | 1550.6999  |
| P06685     | DKYEPAAVSEHGDKK           | 1753.77927 |
| A0A0G2K0F3 | LVSPEPPPK                 | 1043.51729 |
| Q9WV48     | ALTASPPAAR                | 1034.50304 |
| P69735     | KTSPSDSMTK                | 1161.48573 |
| B2RZ23     | RPSSPAPGPSR               | 1188.55211 |
| D3ZQH1     | AAAAPTPPAR                | 1002.47682 |
| Q5XIS8     | AISAPTSPTR                | 1080.50852 |
| Q5U2P5     | LDSPSRSPSK                | 1153.52489 |
| I7FKL4     | YLATASTMDHAR              | 1416.59774 |
| A0A0G2JW88 | ELPPSPEKK                 | 1104.53367 |
| P14270     | LMHSSSLTNSCIPR            | 1682.739   |
| Q4KLH4     | FPQGPPSQMGSPMGNR          | 1767.73425 |
| Q4FZY0     | ADLNQGIGEPQSPSR           | 1648.73265 |
| A0A0G2K490 | SEGSPVLPHEPSK             | 1443.65155 |
| A0A0G2K9F0 | NTADHDESPPR               | 1318.50595 |
| P52481     | AQGQIRSPTK                | 1165.57251 |
| D3Z9I0     | VVTMAEPGAASPPPPAR         | 1727.81863 |
| A0A096MIT7 | LSPQGQPVPSPQSGSPQQQR      | 2214.0299  |
| B2GV74     | VDSPTVNTTLR               | 1282.60387 |
| F1LRI7     | VGSLTPSSPK                | 1149.55513 |
| F1LRZ7     | SPVKEEIKPPAEVK            | 1630.84517 |
| Q7TP42     | EETPGTPK                  | 938.38667  |
| Q6S3A0     | NDESQLSPATR               | 1297.542   |
| A0A0G2JSM7 | GDDASEEGQNGSSPK           | 1557.57007 |
| D3ZSY3     | GVDKPPSPPIEMK             | 1561.73317 |
| M0R5T5     | RAPSPVVSPTELSK            | 1547.7829  |
| Q9JKA7     | RGTPPLTPGR                | 1131.56703 |
| E9PSN4     | LRSPSNDSAHR               | 1319.5852  |
| M0RA26     | DLLHPSPEEEK               | 1373.59845 |
| D4A148     | KGSPQLQTVHSWPGDR          | 1873.85925 |
| Q62768     | ALSPTGSSR                 | 955.42445  |
| F1LMT5     | SPVDSSVLEGVK              | 1296.60829 |
| B2GV94     | GQTPLTEGSEDLDGHSDPPEESFAR | 2654.08899 |
| Q9ET45     | AEIDTHSFGEK               | 1313.54094 |
| D3ZKX8     | GHTENLSPVSK               | 1377.6046  |
| B5DFK6     | NAETVKSPKEGVPVEK          | 1977.95288 |
| P37285     | VDSPTVTTTLK               | 1241.60248 |
| Q68FR9     | ATAPQTQHVSPMR             | 1503.67739 |

|            |                        |            |
|------------|------------------------|------------|
| G3V881     | KSDAGISSADAPR          | 1354.59985 |
| A0A0G2K5C6 | GFKSPCEDFSVTGESEK      | 2080.85693 |
| G3V927     | ANSWQLVETPEKR          | 1637.76831 |
| A0A0G2K2V4 | LADSPSRSPSK            | 1224.56201 |
| F1LNK0     | TPPKSPATPK             | 1103.54965 |
| Q63622     | AISLEGEPR              | 1051.48197 |
| F1M787     | ALQSPEHHIDIYEDR        | 1999.89095 |
| D3ZEX7     | LDVTTPESPK             | 1166.53406 |
| F2Z3T9     | EEHGLIRSPR             | 1330.62634 |
| B1H257     | GLLSGQTSPTNAR          | 1381.64713 |
| A0A0G2KAL9 | NDSIVTPSPQAR           | 1461.67335 |
| D4A510     | KRSPSPSPTPEAK          | 1541.67607 |
| P06686     | AGQENISVSK             | 1112.49835 |
| D3ZUW0     | ISNSSEFSAK             | 1149.48236 |
| A0A0G2K5C6 | EESEAEVKEDVIEK         | 1713.74663 |
| Q00981     | QFLSETEKLSPEDR         | 1758.79459 |
| F1LRL9     | DYNASASTISPPSSMEEDKFSK | 2471.03199 |
| B5DEJ5     | AGNSPEGH CPR           | 1261.47796 |
| A0A0G2K5D7 | LGSSPTSSCNPTPTK        | 1613.68768 |
| F1LM42     | RFTPEEEMFK             | 1409.58069 |
| A0A0G2JTK1 | APPDSPTTPVR            | 1217.55619 |
| D3Z9Z0     | LDQVVESPAIPR           | 1403.69302 |
| B2RYB3     | RESPSPAPKPR            | 1301.63618 |
| D3ZMD4     | HSGGSPEHLQK            | 1256.54194 |
| D3ZCJ3     | VAILTDDEEEQKR          | 1625.74182 |
| F1LUE2     | NSSAITSPK              | 984.43977  |
| M0R5A9     | QEHLTDS PVALGPER       | 1728.79526 |
| A9CMA6     | SPPGPGVPRPPR           | 1390.69911 |
| A0A0G2JTK1 | MDLPGSPSR              | 1039.42782 |
| A0A0G2K5K1 | RPGSPDGLLEEGSPTMVEK    | 2175.99918 |
| F1M1Y0     | AVPATPPR               | 888.43389  |
| M0R9Z5     | RKPSPEPEGEV GPPK       | 1683.81018 |
| F1LUG5     | VEPPHSSHEDLTDDLSTR     | 2114.90263 |
| A0A0U1RRZ5 | ETPAGGNLSPAPR          | 1346.61002 |
| F1LNK0     | DGSPDAPATPEKEEVPFSEYK  | 2373.01699 |
| Q66HQ4     | DHSSQSEEEVVDGEK        | 1754.67526 |
| M0R5T5     | QSNVEDSPEK             | 1212.478   |
| B5DFC8     | QPLLLSEDEEDTKR         | 1752.80515 |
| A0A0G2JSM7 | SPGTPAGEGSGSPPK        | 1405.59952 |
| F1LRZ7     | SPVEVKSPASVK           | 1307.66066 |
| Q3SWT7     | TPTPEPAEVETR           | 1406.61992 |
| D4AE69     | AETETSPGHAPDR          | 1447.58493 |



|                |                                   |            |
|----------------|-----------------------------------|------------|
| M0R919         | KGSPHAMESTR                       | 1193.51328 |
| A0A0G2K0M8     | GVTASSSSPPASVPK                   | 1451.67777 |
| F1LPA3         | AQAPELQEEERPGAVGSPR               | 2229.02956 |
| A0A0G2JSV0     | TASLTSAAASIDGSR                   | 1416.63663 |
| A0A0G2K5C6     | VPSAPGQESPVPDTESTAPMR             | 2248.97917 |
| Q9WUW2         | ADALQAGASQFETSAAK                 | 1745.77419 |
| A0A0G2K6I5     | RGFSEEQLR                         | 1201.53613 |
| D3ZR79         | GGPAEESPR                         | 1076.44083 |
| F1LNK0         | LEETSKVSIETVAK                    | 1742.84595 |
| B5DFK6         | NAETVKSPEK                        | 1182.54021 |
| O35314         | EQSSQESGEETRR                     | 1602.63915 |
| P05065         | GILAADESTGSIK                     | 1412.66687 |
| Q5M7V8         | HGLTHEELKSPR                      | 1483.70532 |
| Q6QIX3         | NRVQSGLSPER                       | 1409.65328 |
| F1LM42         | AEGFESEEGATKPK                    | 1775.73713 |
| D3ZXQ2         | DLPDGHAVSPR                       | 1243.54669 |
| F1LRZ7         | AEEKEPLTEKPKDSPGEAK               | 2163.02169 |
| G3V733         | TPALSPQRPLTTQQPQSGTLK             | 2329.19115 |
| D3ZMX6         | GLGPPSPAPPR                       | 1222.598   |
| Q91Z79         | GEGPAIPGDTPPPTPR                  | 1638.75233 |
| F1LRZ7         | SPVTVKSPAIAK                      | 1293.64501 |
| Q5HZV9         | VESEESGDEEGK                      | 1374.49444 |
| A0A0G2K5C6     | ALGLEESPAEGSK                     | 1367.60902 |
| F1M2K6         | VGSPLTLTDAQTR                     | 1438.69375 |
| D4A8H5         | AEETETASSPEKDR                    | 1726.71673 |
| D3ZQ17         | RATPEPEEAGGR                      | 1349.58453 |
| D3ZDU2         | ILDTSSTLQASAPSTNK                 | 1910.91068 |
| B1WBR5         | SPPIPAKPR                         | 1042.54451 |
| D3ZC55         | ETAPTSAYSSPAR                     | 1417.59952 |
| Q9QXY2         | AAQGPAGSPDKGK                     | 1263.57291 |
| P09951         | LPSPTAAPQASQATPMTQGQGR            | 2490.14428 |
| P84060         | AQATGSPHTSPTHGGGR                 | 1698.73439 |
| B1WBY8         | MLPHAPGVQMQAIPEDAVHEDSGDEDGEDPDKR | 3665.552   |
| F1LST4; D3ZKD9 | VAVVRTPPK                         | 1046.57581 |
| P35465         | DVATSPISPTENNTTPPDALTR            | 2377.09189 |
| G3V7X5         | AEKPSALNSEEEAHEQSTEQDK            | 2537.06753 |
| A0A0G2K5C6     | EVVDPSPGDK                        | 1122.47146 |
| O88989         | KLSSAMSAK                         | 1073.50607 |
| P53987         | SKESLQEAGK                        | 1156.52456 |
| A0A0G2JWP1     | GQGTLLQHSVPGPAGPASIER             | 2038.97059 |
| G3V846         | DVEMGNSVIEENEMK                   | 1803.71766 |
| F1LRZ7         | SPAIEVKSPATVK                     | 1373.61134 |

|                |                             |            |
|----------------|-----------------------------|------------|
| D3ZQL6         | KPSPSTSPTVR                 | 1236.59839 |
| F1LRL9         | MSISEGTVSDK                 | 1233.50686 |
| Q5XIU9         | LLKPGEEPSEYTDEEDTKDHSK      | 2627.13963 |
| A0A0G2K5C6     | MASPPSPGPPSAAHTPFHQSPVEDK   | 2729.14666 |
| G3V9X2         | VDLAGSPDQEASGLPDPR          | 1903.84333 |
| A0A0G2K4T3     | YSTLLSPSEQEK                | 1461.65088 |
| D3ZF45         | RSPPPAAGK                   | 960.46626  |
| A0A0G2K0F3     | ELKPEQETTPR                 | 1407.65155 |
| F1LM42         | KTSTDFSDVIK                 | 1320.60829 |
| F1LRZ7         | TLDVKSPEAK                  | 1167.5657  |
| O08779         | SQEMVHLVNK                  | 1264.57555 |
| A0A0G2K5C6     | EVVPDSPGDKGSTNR             | 1637.71667 |
| D3ZMX6         | GPAGEASASPPVR               | 1275.57291 |
| D3ZM69         | ASQPGPTAESQSSPHR            | 1716.73372 |
| A0A0G2K376     | ERDHSPTPSVFNSDEER           | 2081.85602 |
| P11730         | QSSAPASPAASAAGLAGQAAK       | 1891.89095 |
| M0R5P8         | SNSWQGNVGGNK                | 1327.54267 |
| P08482         | ELAALQGSETPGK               | 1380.64065 |
| Q9QXY2         | FRQSLPLSR                   | 1183.59833 |
| Q64595         | LQDVIHVQGGSPQLQASPDKVPLDVHR | 2885.46693 |
| A0A0G2QC38     | RPTEAVSPK                   | 1064.5136  |
| F1LST4; D3ZKD9 | TDHGAEIVYKSPVVSGDTSR        | 2295.06528 |
| P34058         | IEDVGSDEEDDSGK              | 1574.57415 |
| Q01728         | GMIIEHEGDRPASK              | 1619.72473 |
| A0A0G2K2D6     | TPPKSPGDKPAK                | 1174.55038 |
| A0A0G2K0F3     | GTVSPPAVEPETEDR             | 1663.72109 |
| F1M6X3         | HGTSPVGDHGLVLR              | 1498.67983 |
| F1LRL9         | EVPSKEEQSPVKA EVAEK         | 2063.98966 |
| A0A0G2K2M9     | RQPSPQSPR                   | 1229.57866 |
| A0A0G2JZI0     | APTAAPSPEPR                 | 1173.52998 |
| B5DFK6         | SPEKEGVPVGEK                | 1335.61919 |
| Q812E9         | SKEEQELHDIHSTR              | 1788.79123 |
| A0A0G2JU11     | HIPAAALPVSGTLSSSNPDLLQSHHR  | 2714.341   |
| O35814         | HDSPEDVK                    | 1006.38773 |
| P10362         | EHLGQGSSQEMEK               | 1539.61451 |
| O35823         | NMAPSQQSPVR                 | 1294.56096 |
| Q9JMB3         | VESISVGSVSPGGVK             | 1481.72472 |
| A0A0G2K490     | QNSDPPTSENPLPTR             | 1732.75378 |
| Q02563         | GGLSDGEGPPGGR               | 1235.50522 |
| F1LZX5         | TEGTPPPGQPAK                | 1356.61952 |
| G3V8E2         | AASPPASASDLIEQQQK           | 1820.8426  |
| F1LM42         | AERHSPVFSKGPEK              | 1648.7843  |

|                |                          |            |
|----------------|--------------------------|------------|
| A0A0U1RRZ5     | FSDEEDGRDSDEEGAEGHK      | 2188.79387 |
| F1LMT5         | MSKSPVDSSVLEGVK          | 1642.77577 |
| D4A997         | VLGEEGSR                 | 1055.4405  |
| F1LRZ7         | SPATVKSPVEAK             | 1373.61134 |
| G3V8W2         | LDGETASDSESR             | 1346.51076 |
| D3ZT07         | LATPEDKQDIDK             | 1452.66178 |
| P12839         | EEEPEVEKSPVK             | 1479.66145 |
| D4A206         | GTAASTTGASASSPR          | 1401.60058 |
| P0DP31         | MKDTDSEEEIR              | 1432.56617 |
| F1LNK0         | KSEVQAHSR                | 1305.5947  |
| F1M4K6         | LETTPTSPLPER             | 1521.71963 |
| Q5BJU0         | KFQEQCPPSPEPTR           | 1909.815   |
| A0A0G2K9D7     | KPGAASPLASR              | 1134.5667  |
| Q05175         | AGEASAESTGAADGAPQEEGAK   | 2212.88777 |
| G3V9W0         | RMSPKPELTEEK             | 1652.77135 |
| A0A0G2K5C6     | KHSPGEITGPGGHFMTSDSSLTK  | 2451.10102 |
| D3ZQ59         | LGADSEEEGR               | 1271.47873 |
| A0A0G2K5C6     | MASPPSGPPSAAHTPFHQSPVEDK | 2649.18033 |
| Q925G1         | VPSASDSR                 | 1100.42557 |
| P11506         | QNSSPSSLNK               | 1238.54127 |
| F1LM42         | SPQGLELPLHNR             | 1440.6995  |
| F1LRZ7         | SPMKEEAKSPEK             | 1440.64402 |
| P63319         | MGPSSSPIPSPSPTDSKR       | 2091.94166 |
| F1SW39         | EDTDQEEKASNEVDTK         | 1917.75972 |
| Q4G061         | AEEEGSDGSAAEAEP          | 1741.65486 |
| D3ZWX4         | AAPATPPPVK               | 1125.57039 |
| D3ZXY2         | EETQPLSHSPK              | 1332.58314 |
| B2RYB3         | VSHSPPK                  | 928.42881  |
| D4ACW0         | KEESPPPK                 | 1088.50237 |
| D3ZT71         | RKSHTGEAIAAR             | 1376.67944 |
| F8V328         | LEGNSPQSSHGK             | 1476.64786 |
| Q6DGF9         | DVQAAPEPSHPPKEPAPPSPESR  | 2500.15041 |
| F1LST4; D3ZKD9 | TPPGSGEPPK               | 1046.45542 |
| A0A0G2K0F3     | RSEAEGEVR                | 1241.51579 |
| A2RRU1         | HSSPHQSEDEEPR            | 1743.66061 |
| Q9JMB3         | AEEATPVAALR              | 1207.57184 |
| Q6IRG7         | FYYSSGSSPTHAK            | 1598.65228 |
| G3V8L9         | ATEEPSGTGSDELK           | 1613.6942  |
| F7F2F3         | CHAEHTPEEEIDHTGAK        | 2040.81171 |
| G3V953         | VEGTEIVKPSPK             | 1363.68687 |
| D3ZS18         | IPLKPSPTK                | 1060.58022 |
| Q7TPI7         | KESPPPLVPPAAR            | 1438.74539 |

|            |                        |            |
|------------|------------------------|------------|
| Q6PDU1     | SRSPPPVSK              | 1034.50304 |
| D3ZKY6     | GSNSDSPPGHSAPVSPER     | 1954.82907 |
| P82995     | ESDDKPEIEDVGSDEEEEEKK  | 2516.00834 |
| D3ZBU7     | DKSPSEGDVAPPKR         | 1562.72103 |
| Q5HZV9     | VESEESGDEEGKK          | 1502.5894  |
| F1M7P4     | LLGSGSPSSAR            | 1198.54636 |
| F1LRZ7     | SPAIAKSPAIAK           | 1265.57732 |
| P31016     | VHSDSETDDIGFIPSK       | 1826.78442 |
| Q6AYB2     | AKSELALAPAPAPAATHSPLHR | 2286.17544 |
| A0A0G2K8E6 | VAHSDKPGSTSAVSFR       | 1725.79559 |
| A0A0G2K847 | LDPPPSPHANR            | 1280.57833 |
| Q925G1     | KVPSASDSDSR            | 1228.52054 |
| Q64548     | REQDSPPMKPGVLDAIR      | 1988.96234 |
| D3ZWT6     | LGNPYCSPTLVR           | 1456.66543 |
| P06685     | AVAGDASESALLK          | 1311.61919 |
| O35412     | LIDLESPTPESQK          | 1536.7193  |
| G3V6L9     | FLQDHGSDSFLAEHK        | 1810.7796  |
| D4AE00     | GPGSEEAATAALPAR        | 1477.66826 |
| Q9JJ54     | NEEDEGHNSNSPR          | 1537.55508 |
| A0A0G2K6S9 | VIENTDGSEEMDAR         | 1774.68372 |
| D4AEK9     | LDQPVSAPPSPR           | 1343.63551 |
| D4A652     | DLVQPKPASP             | 1374.66647 |
| F1LWK7     | TLSPTPSAEGFQDGR        | 1642.71086 |
| F1LRZ7     | SPAIVKSPAIAK           | 1293.60862 |
| A0A096MJX5 | VGDTEKPEPERSPPNR       | 1887.85965 |
| Q9JKS6     | EKPELVDDLSPR           | 1477.69342 |
| F1M1Y0     | HVPSPLNLEEVQK          | 1569.76725 |
| Q641X2     | KLNSDEEGESSGK          | 1459.59482 |
| D4A4M0     | LHSQDPLLSPER           | 1471.69408 |
| F1LRL9     | SSISPMDEVPDSEPIEK      | 2123.90902 |
| F1LRZ7     | SPAIAKSPAIAKPPAIAK     | 1858.89463 |
| D4A8G7     | GPPSPAPVMHSPSR         | 1593.72434 |
| F1M455     | KTSPEAEDTR             | 1213.50964 |
| Q3B8Q1     | AEEPSEEEADAPKPK        | 1706.71567 |
| F1M3W5     | ESEAGTGSSEHEDGER       | 1756.62937 |
| A0A0G2K904 | DGQDAIAQSPEK           | 1338.55732 |
| G3V927     | AMGDEDSDESOGGSPKPSPK   | 2027.78997 |
| P62775     | GEDVNRRTLEGGR          | 1382.606   |
| F1M1Y0     | NLSSEEVARPR            | 1337.62092 |
| P11275     | ESSESTNTTIEDEDTK       | 1865.71718 |
| A0A0G2K2M9 | VPSPTVVK               | 1001.50672 |
| D4ABT8     | AVEEQGDDQDSEK          | 1529.56392 |

|                       |                               |            |
|-----------------------|-------------------------------|------------|
| F8WFS9                | DAATEEPGSPVK                  | 1280.5406  |
| A0A0H2UHG4            | RASLSDIGFGK                   | 1230.58783 |
| Q5PQP4                | LHLESPQSPK                    | 1312.62969 |
| A0A0G2K4U6            | RPMEEDGEEKSPSK                | 1714.69897 |
| P12839                | EEAEEKEEPEVEKSPVK             | 2194.9639  |
| F1LR98                | KKEPLIISK                     | 1135.64864 |
| D3ZBU7                | DKSPSEGDVTPPKR                | 1592.73159 |
| F1LRZ7                | SPAEEKSPASVK                  | 1251.59806 |
| A0A0G2K613            | AAATPESQEPQAK                 | 1407.61517 |
| A0A0G2K5C6            | SPPCEDFSVTGESEK               | 1748.67209 |
| D3ZY00                | DSGLEDGGESPSFDTPSQR           | 2060.80806 |
| Q9R066                | APQSPTLPAK                    | 1160.57112 |
| M0R5I3                | AEEAQRDNEGE                   | 1428.52747 |
| Q9JKS6                | HSWHDEDDETFDESPELK            | 2295.87139 |
| A0A0G2K4U6            | RPMEEDGEEKSPSKK               | 1826.79902 |
| M0R9R3                | ASQVKPGDSLPR                  | 1334.64641 |
| Q9WTY2                | GHAGGQRPEPSSPDGPAPPTR         | 2147.96182 |
| D4A626                | IKESPSEQESR                   | 1369.59952 |
| G3V8A5                | PTTQQSPQDEQEK                 | 1595.65849 |
| Q568Y8                | RDPSLEEIQK                    | 1294.60387 |
| Q63475                | LEEQADSIAGAIQSDPVEGSQESHGR    | 2790.2214  |
| Q9JI66;<br>A0A0H2UHB7 | NLTSSSLNDISDKPEK              | 1827.83718 |
| P04775                | EDEGTPIKEDIITDK               | 1782.80448 |
| A0A0G2JZ27            | GATADDSGGSPVLAAK              | 1553.68431 |
| D3ZVD8                | HNPQSPLQDSSATLK               | 1702.7796  |
| A0A0G2K6W6            | RPGPEHSLGLEKESDEEPED          | 2329.98201 |
| A0A0G2K5C6            | VPSAPGQESPVPDTESTAPMR         | 2232.98425 |
| A0A0G2K0F3            | LPSSPASPSPK                   | 1147.53948 |
| A0A0G2K9J0            | FSPPPVGQGK                    | 1150.52925 |
| O35458                | GGAPLPSPSGSKDQAVGAGGEFGGHDKPK | 2698.26208 |
| A0A0G2K5C6            | AELEEMEETHPSDEEGEETK          | 2398.9116  |
| A0A0G2K6E8            | GTDTPNKAEISK                  | 1340.60935 |
| D3ZXQ2                | KFSPSQVPVQTR                  | 1453.71991 |
| B5DFH0                | HASLDGASPYFK                  | 1372.59331 |
| Q6MG06                | REEQTDTSDGESVTHHIR            | 2176.92549 |
| P12839                | EEPEVEKSPVKSPEAK              | 1991.92091 |
| A0A0G2QC02            | GDAASASPSSTPLIR               | 1509.69448 |
| B2GV74                | KLDEDASPNEEKGDVPK             | 1950.86921 |
| A0A0G2JW90            | YHGHSMDPGVSYR                 | 1672.65738 |
| F1M4N6                | GNVLASHSPMSPENIK              | 1760.80371 |
| Q9JKM5                | DGMDTSCSTGSPGAATANR           | 1935.72085 |

|            |                         |            |
|------------|-------------------------|------------|
| P07936     | AGSAETESAAK             | 1101.44598 |
| G3V8P8     | ALPSVGLPSDQSPQR         | 1631.77888 |
| P07936     | AAQPPTETAESSQAEEEK      | 1982.82265 |
| Q8VHK7     | AGDMLLEDSPKRPK          | 1523.69237 |
| P50617     | LRPGSPEPPPR             | 1282.63036 |
| A0A0G2K598 | LDNTPASPPR              | 1147.51433 |
| P09456     | EDEISPPPNPVVK           | 1597.75093 |
| O88321     | AAAASAAEAGIATPGTEGER    | 1880.83858 |
| A0A0U1RRZ5 | GSETGSETHESDLAPSDK      | 1926.76005 |
| Q9Z0U4     | RHPPTPPDPSGGLPR         | 1660.79553 |
| P06685     | EVSMDDHKLSLDELHR        | 2003.88923 |
| F1MAK3     | DVINRSPTQLGK            | 1407.69917 |
| P06686     | EDSPQSHVLVMK            | 1449.64436 |
| Q5FWU3     | HPEPVPEEGSEDELPPQVHK    | 2330.03365 |
| P19804     | VMLGETNPADSKPGTIR       | 1881.8776  |
| A0A0G2JTK1 | GVGVSPSPVR              | 1034.50304 |
| Q5HZV9     | RVESEESGDEEGKK          | 1658.69052 |
| P54287     | RSPPPSLAK               | 1032.52377 |
| D3ZBU7     | ILVSSSRPQSPDHMSDASVSSR  | 2423.10208 |
| D4A631     | VETEKQSPPHGEAK          | 1616.73159 |
| Q9Z1T4     | QEVTGSSAVSPIRK          | 1538.75741 |
| D3ZE55     | EERPGAAGGGASAPGSPDETAR  | 2119.90403 |
| A0A0G2K429 | NVEPPSPTPAAR            | 1315.60421 |
| D3ZMD4     | HHASGGSPEHLQKPR         | 1717.79184 |
| A0A0G2K1L4 | APSQAAESSPTKK           | 1381.6359  |
| F1LRZ7     | SPAEVKSPATVK            | 1293.64501 |
| P61265     | DSDDEEEVVHVDR           | 1623.61702 |
| F1LV89     | RESPPAGQK               | 1049.47755 |
| B2RYB3     | LSPSASPPR               | 991.46084  |
| F7EV94     | IGHHSTSDDSSAYR          | 1612.63875 |
| D3ZSI8     | KIPLKPSPTK              | 1188.67519 |
| A0A0G2K8W9 | RPPSPEPSAK              | 1145.53506 |
| A0A0G2K0F3 | RSEAEEGEVRTPTK          | 1668.75887 |
| P49803     | SHSPHTPTPETKPPTDELHR    | 2574.16204 |
| P21707     | DDDAETGLTDGEEKKEEPKEEEK | 2573.0298  |
| Q02294     | RGSPEEATER              | 1211.50522 |
| F1M1Y0     | TGSPLTVATGNDQAATEAK     | 1911.86954 |
| Q5BJT1     | RHSTEGPEDPPPWAEK        | 1912.82253 |
| A0A0G2JXY9 | AGGSPASYHGSTSPR         | 1511.62746 |
| P25113     | HGESAWNLENR             | 1392.56922 |
| A0A0G2QC21 | EIKPSEKPVSPK            | 1418.72907 |
| D3ZZM9     | AHSVDVEK                | 964.41355  |

|            |                                  |            |
|------------|----------------------------------|------------|
| G3V718     | VLSEKPTPEGPEK                    | 1490.71382 |
| P19527     | ESEEEEEKKEESAGEEQAAK             | 2216.90784 |
| A0A0G2K5C6 | AELEEMEETHPSDEEGEETK             | 2414.90652 |
| G3V699     | VAQSDGEESPAEEGQLGER              | 2180.93433 |
| A0A0G2JSM7 | SPPDQSAVPNTPPSTPVK               | 1898.88955 |
| F1LRZ7     | SPVEVKSPASVK                     | 1387.62699 |
| Q6MG06     | EEQTDSDGESVTHHIR                 | 2020.82438 |
| F1LRZ7     | SPVEVKSPEK                       | 1179.5657  |
| Q5PQS2     | MVEAVDRITIEK                     | 1370.63854 |
| Q9JMB3     | VISQTNLITVTPEKK                  | 1851.98272 |
| F1LRZ7     | EPLTEKPKDSPGEAK                  | 1705.80442 |
| F1LST0     | MSDSPSHVATK                      | 1255.50244 |
| A0A1W2Q6Q2 | ISQHGGSSSTLSSTK                  | 1556.69521 |
| F1LNK0     | KDDQSPLDIK                       | 1238.56642 |
| E9PT53     | LNATTSLEQDKIEPPR                 | 1891.9161  |
| P23978     | VADGQISTEVSEAPVASDKPK            | 2208.04315 |
| O70150     | HSHPGGLGTSQSPK                   | 1412.63182 |
| A0A0G2K0X1 | VTNDISPESPGVGR                   | 1594.71086 |
| F1LR60     | APTPGGGHPDSPGLPAPAGQQQR          | 2273.04588 |
| D3ZE17     | VPLPGPSPEVK                      | 1256.62863 |
| Q6AY65     | HPSHSTSPSGPGDEVAR                | 1797.75518 |
| F1LPM3     | RGSLPDNSILHR                     | 1444.70565 |
| D3ZWC6     | GSGTGHPGTGVPQAPDSPAGVR           | 2081.94002 |
| Q569C9     | AAGGGGGSGEDEAQR                  | 1485.56017 |
| B1WC16     | YSPSQNSPIHHIPSR                  | 1799.82247 |
| Q6AY30     | SVSNLKPVPVIGSK                   | 1504.81347 |
| Q9Z1T4     | QEVTGSSAVSPIR                    | 1410.66245 |
| Q5RJL0     | YREGSPLKEESLAR                   | 1714.81599 |
| D3ZC12     | VGVEELSEEDQNEHR                  | 1849.75999 |
| A0A0G2K9C5 | KAEAAAAPAVAPGPAQPGHVSPTPATTSPGEK | 3043.48845 |
| F1LNK0     | GNAQESLDTVSPK                    | 1425.62573 |
| Q9QXY2     | RFSNVGLVHTSER                    | 1581.75333 |
| Q920Q0     | KSTPVRSPGGSTMMK                  | 1723.73082 |
| D3Z8W6     | EEHGAQAGPASAPASAPAQGSFPR         | 2371.04628 |
| A0A0G2K9J0 | IPESELGSPTL TSAQK                | 1737.83064 |
| G3V792     | VGHDSLENQDK                      | 1450.58459 |
| F1LRL9     | SPSLSPSPSPEIK                    | 1502.71382 |
| F1M392     | KETDDIESPKR                      | 1397.63082 |
| A0A0G2KA27 | KRSPTENVNTPVGK                   | 1606.79486 |
| Q80UA9     | AEGETESPRPK                      | 1280.55184 |
| D4A1G8     | EIHDVAGDGLSGPGPTR                | 1959.84439 |
| F1LRL9     | DVSDERLSPAK                      | 1296.58314 |

|            |                                       |            |
|------------|---------------------------------------|------------|
| A0A0G2KA27 | SPTENVNTPVGK                          | 1322.59879 |
| P31596     | MHDSHLSSEEPK                          | 1492.5774  |
| M0R5J4     | YDLDFKSPDDASR                         | 1608.65776 |
| Q63226     | VNSLCTDDDSPHK                         | 1567.60943 |
| A0A0G2K613 | GEVAPKETPK                            | 1135.53948 |
| F1M1Y0     | EKVVTTPAASDIPADSPAPGPPGPPGSAGPPGPPGPR | 3471.69442 |
| A0A0G2K5C6 | EKEVVPDSPGDK                          | 1379.60902 |
| A0A0G2JW88 | NTTPTGATPPAGMASTR                     | 1710.75168 |
| A0A0G2K5C6 | KLSKPDLKPFPTPEVR                      | 1834.98266 |
| Q9JKA9     | GAASGPAAEEAGSEEAGPAGEPR               | 2218.92482 |
| A0A0G2K9C5 | AEAAAAPAVAPGPAQPGHVSPTPATTSPGK        | 2915.39349 |
| A0A0G2K613 | GEVAPKETPKK                           | 1263.63444 |
| Q99MZ4     | LPSSSEMGSQDGSPLR                      | 1814.76263 |
| F1LMX1     | GNKSPSPPDGSPAATPEIR                   | 2134.92061 |
| D3ZZP8     | AEAEPAGAKPESPK                        | 1461.66212 |
| A0A0G2JXW4 | NEKSEEEQSSASVK                        | 1631.67962 |
| P61265     | SAKSDDEEEVVHVDR                       | 1909.78112 |
| Q05140     | KPGNNEGSGAPSLSK                       | 1619.74249 |
| M0R5H1     | LGGKSPPPPPPPR                         | 1473.76138 |
| Q6P791     | LLLDPSNTPTK                           | 1278.63411 |
| P12839     | GVVTNGLDVSPAEEK                       | 1594.73601 |
| Q4KLK7     | EEVASEPEEAASPITPK                     | 1863.82595 |
| Q08163     | LEAVSHTSDMHCGYGDSPSK                  | 2257.88897 |
| D3ZEX7     | LRPVSPEIR                             | 1275.64568 |
| Q99ND8     | HTESGPAELDSPK                         | 1447.61008 |
| A0A0G2K5C6 | QEPDPGPNVEPSITPPAVPPR                 | 2274.0802  |
| F1LRZ7     | SPASVKSPSEAK                          | 1267.59297 |
| P0C5W1     | KPPPPASPGSSDSSAR                      | 1617.72684 |
| P07936     | KEGDGSATTTAAPTSPKAEEPSK               | 2425.07663 |
| P34058     | IEDVGSDEEDDSGKDK                      | 1817.69605 |
| F1LR60     | SASTESGFHNHTDTAEGDVLAAAR              | 2524.07361 |
| A0A1E1ERK2 | HSAILASPNPDEK                         | 1458.66245 |
| A0A0G2K3S6 | LASDDRPSPPR                           | 1290.58381 |
| F1LM42     | HSPVFSGKPEK                           | 1292.60348 |
| Q63226     | VPSKEDDKIDLEHLHR                      | 2140.00704 |
| P19527     | DEPPSEGEAEIEEEK                       | 1654.60036 |
| Q8VHK7     | AGDMLEDSPK                            | 1158.43845 |
| O35254     | KPPSASSPGTPAK                         | 1304.62461 |
| Q62717     | VILHPTPNSPK                           | 1282.65551 |
| F1LPP6     | RPEAASPQKER                           | 1348.6369  |
| B2RZ23     | RPSSPAPGSPQATDSR                      | 1787.80722 |
| F1LRZ7     | SPAIAKSPAIAKPPAIAK                    | 1938.86097 |



|            |                          |            |
|------------|--------------------------|------------|
| D4A0X3     | KPGGGDLPLHSASDDETPR      | 2028.90224 |
| A0A0G2K5C6 | VRGESSEALK               | 1155.54054 |
| P12839     | SPVEEVKPKPEAK            | 1517.7611  |
| F1SW39     | ETSVSKEDTDQEEK           | 1704.68476 |
| O55007     | EPEPLHSPDSEK             | 1472.60533 |
| Q9QXY2     | RGSDDELTVPR              | 1209.56234 |
| P31596     | MHDSHLSSEEPK             | 1476.58249 |
| F1LNK0     | VTDGITKSPEK              | 1254.59772 |
| A0A0G2K5C6 | HTQEALKASPK              | 1289.62494 |
| F1LPH1     | KGSDEVTASSAATGTSPR       | 1801.79638 |
| Q03555     | DTASLSTTPSESPR           | 1528.65267 |
| P34058     | EKEISDDEAEEK             | 1630.63675 |
| F1M1Y0     | RSTPTPELTSK              | 1296.61952 |
| A0A0G2JTG7 | HTGPNSPDTANDGFVR         | 1764.73372 |
| Q5BJU0     | FQEQECPPSEPTR            | 1781.72004 |
| P82995     | DKEVSDDEAEEK             | 1473.56286 |
| D3ZMD4     | LSGSPEHFQK               | 1209.52998 |
| A0A0G2JWM2 | REHANIDAQSGSQASNPSATVSPR | 2560.1536  |
| Q63633     | NKGSPVSSSEGIK            | 1379.65664 |
| O88778     | ISKFSPIEEAK              | 1328.64976 |
| A0A0G2K613 | GDVTAEEAAGASPAK          | 1453.62064 |
| F1LRZ7     | SPAEVKSPVTVK             | 1401.64264 |
| F1LRL9     | GEAEQSEEEGEEEEEDKAEDAR   | 2445.90494 |
| A0A0G2JZ88 | RDESDEEPPR               | 1309.50562 |
| A1L1L5     | KPSPQSPPR                | 1170.5667  |
| D3ZWL6     | DGGEALVSPDGTVTEAPR       | 1850.81678 |
| D3ZNZ9     | PEPSRSTPAPK              | 1246.58274 |
| F1M787     | GGSPLTQTGGSPTK           | 1468.66793 |
| F1LM42     | HPPVSPGK                 | 898.41824  |
| D3ZSY8     | HGASAAPSPPPR             | 1224.55211 |
| P41777     | AGKESEEEEEEDTEQNKK       | 2059.83394 |
| P34058     | IEDVGSDEEDDSGKDKK        | 1945.79102 |
| Q99MC0     | GPGGSPSGLQK              | 1064.47722 |
| A0A0H2UI14 | VHAYFAPVTPPPSVGGSR       | 1918.92112 |
| A0A0G2K5C6 | ALALVPGTPTR              | 1175.6184  |
| D3ZJR6     | VASPANVGTLHTLSR          | 1602.79995 |
| D4A731     | GVAPADSPDAPR             | 1232.53071 |
| Q5YLM1     | GSPSLHAVLER              | 1245.59873 |
| A0A0G2K2D6 | AANKTPPKSPGDPK           | 1638.72883 |
| O54701     | GGSSASLHNSLMR            | 1396.60389 |
| A0A0G2K9J0 | QIASDSPHASP              | 1317.58347 |
| M0RDJ7     | GTDDSPKNSQEDLQDR         | 1884.76072 |

|            |                                      |            |
|------------|--------------------------------------|------------|
| FILMX1     | VNHEPEPASGASPGATIPK                  | 1938.8957  |
| P07936     | KEGDGSATTDAAAPATSPK                  | 1783.77458 |
| FILMX1     | SPSPPPDGSPAATPEIR                    | 1755.79492 |
| P53987     | DGKEDETSTDVDEKPK                     | 1872.77464 |
| F1M6X3     | EPEPAPPYHSPEDSR                      | 1787.72724 |
| A0A0G2K2D6 | AANKTPPKSPGDPKAK                     | 1558.7625  |
| F1LRZ7     | SPAIAKSPVEVK                         | 1401.60625 |
| D3ZE17     | AQPGSPQALGGPHGPATAK                  | 1821.86434 |
| F1LRZ7     | SPAIAKPPAIAK                         | 1275.59806 |
| F1LRZ7     | SPVKEIAKSPAIAK                       | 1550.74618 |
| Q62976     | LEDEQPPTLSPK                         | 1433.65597 |
| G3V8G4     | EVAGETGSPELSGVPR                     | 1664.75272 |
| P13233     | GKPVVHGSR                            | 1113.55647 |
| F1LRZ7     | EEIKPPAIEVKSPEK                      | 1660.81934 |
| F1LRZ7     | SPVKEIAKSPAIAK                       | 1630.71251 |
| O88778     | QASATAPGRESR                         | 1407.63763 |
| F1LRZ7     | SPAIVKSPVTVK                         | 1321.67631 |
| P82995     | ESDDKPEIEDVGSDEEEEEK                 | 2387.91338 |
| P63319     | AAPALTPPDR                           | 1088.5136  |
| M0R5T5     | APSPVVSPTELSK                        | 1391.68179 |
| D3ZTF0     | VPQSLTTAPASPPVLQR                    | 1841.95209 |
| Q64548     | DSEVSTKPEGVHAPNQSPVEGK               | 2469.12934 |
| D4A2Q3     | SHSSPSLNPDASPVTAK                    | 1774.80073 |
| D3ZFB6     | QENGAVVPLQAGDGEEGPAPQPHSPSTK         | 2974.35783 |
| F1LRZ7     | SPEQVKSPAK                           | 1150.55038 |
| P35565     | AEDEILNRSPR                          | 1508.67408 |
| Q569C0     | RESQTALVVNQR                         | 1480.72678 |
| F1LMW7     | AEDGAAPSPSSETPKK                     | 1651.72109 |
| A0A0G2K5C6 | EGEGGAGAPDSSSFSPK                    | 1659.6534  |
| D3ZBC7     | LAGLGPEDDPDTTDEQEPR                  | 2148.86049 |
| A0A0G2JZ27 | LPDEEPSK                             | 1091.46565 |
| F1LRZ7     | SPAIAKSPAIVK                         | 1293.60862 |
| Q05175     | AEPEKSEGAEEQPEPAPAPEQAAAAPGPAAGGEAPK | 3645.62284 |
| P09216     | LAAGAESPQPASGNSPSEDDR                | 2135.88771 |
| A0A0G2K5C6 | MASPPSPGPPSAAHTPFHQSPVEDK            | 2745.14157 |
| D4A6T9     | RSPTSTGDTELKEER                      | 1785.80146 |
| Q5HZV9     | RVESEESGDEEGK                        | 1530.59555 |
| F1LNK0     | VDHGAEIITQSPSR                       | 1589.73193 |
| A0A0G2JZB4 | DGLAPEKTSPDREK                       | 1622.74216 |
| A0A0G2JW85 | YGSQEHPIGDK                          | 1310.54127 |
| F1LRZ7     | SPAIAKSPVIAK                         | 1263.63444 |
| F1LRZ7     | SPAIAKSPVEVK                         | 1321.63992 |

|                       |                        |            |
|-----------------------|------------------------|------------|
| F1LRZ7                | SPAEVKSPAVAK           | 1263.63444 |
| Q01728                | GMIIEHEGDRPASKTEIEMDGK | 2523.12552 |
| D3Z955                | AVAGVMITASHNR          | 1406.66101 |
| Q99M64                | VAAAGSGSPPCSPGHDR      | 1799.75307 |
| A0A0G2K7N9            | HNLDVVSPVPINK          | 1511.76177 |
| D4A055                | HSNHSTENSPIER          | 1587.65474 |
| D4A644                | KPGAGGSPALVR           | 1189.6089  |
| A0A140UHX9            | HIEPELAGRDSPVR         | 1655.79011 |
| A0A0G2K5C6            | DFQEDSWGKTHSPGVSK      | 2113.88625 |
| P19527                | AEEAKDEPPSEGEAEIEEEK   | 2182.85474 |
| G3V888                | AKPAMPQDSVSPR          | 1560.724   |
| Q99MC0                | QPGFPQSPSDDPSLSR       | 1988.87496 |
| Q9WV48                | EQDVVPFQESPK           | 1482.65122 |
| P19804                | VMLGETNPADSKPGTIR      | 1865.88269 |
| F1LMX1                | GNKSPSPPPDGSPAATPEIR   | 2054.95427 |
| Q6J4I0                | VSEHSSPEEESSPHQR       | 1901.76614 |
| F1LNK0                | VAIIRTPPK              | 1074.60711 |
| F1LRZ7                | EEAKSPAEEKSPAEEK       | 1802.76092 |
| P04775                | GKEDEGTPIKEDIITDK      | 1967.92091 |
| B0LPN4                | EAATPEEEGGAPEK         | 1494.59957 |
| D3ZE26                | FGSADNIAHLK            | 1252.57218 |
| Q91Y81                | IYHLPDAESDEDEDFKEQTR   | 2517.04533 |
| P70580                | EGEPTVYSDDDEPKDEAAR    | 2345.9293  |
| P13668                | RKSHEAEVLK             | 1276.64093 |
| Q9JMB3                | KAEEATPVAALR           | 1335.66681 |
| A0A0U1RRZ5            | EGPEPEEVPAPTPPAPK      | 2019.93108 |
| M0R7R2                | DADEEDSDEETSHLER       | 1956.69784 |
| F1M1Y0                | ATPPPPPPPTYR           | 1370.65043 |
| F1LRZ7                | AKSPVKKEIKPPAEVK       | 1829.97724 |
| Q8VHK7                | AGDMLEDSPK             | 1142.44353 |
| F1LRZ7                | SPAGAKSPAEEK           | 1193.55619 |
| A0A0G2JW88            | AAVGLTGNDIATPPNK       | 1618.78363 |
| P10980                | KEPVANQDPVSPSLVQGR     | 2000.9801  |
| P31662                | VPSEAPSPMPTHR          | 1485.65559 |
| B5DFH0                | GAGDEVSELPAARSPPR      | 1885.88038 |
| A0A0G2K0F3            | SEAEEGEVRTPTK          | 1512.65776 |
| A0A0G2JWE3            | AAVLSDESEDEKASAAS      | 1786.77424 |
| P07936                | KGEGDAAPSEEK           | 1297.53077 |
| Q05175                | KAEGAGTEEEGTQK         | 1514.63702 |
| D3ZVD8                | GAVPHSSPNLAEVK         | 1485.70973 |
| Q9JI66;<br>A0A0H2UHB7 | MFSNPDNGSPAMTHR        | 1741.68222 |

|                           |                         |            |
|---------------------------|-------------------------|------------|
| F1M842                    | LTTSEEEERSPAK           | 1427.64138 |
| M0RDJ7                    | ADEDKSDTEGKPAR          | 1598.66939 |
| D4A206                    | KGTAASTTGASASSPR        | 1529.69554 |
| F1LRZ7                    | SPAEVKSPAIAK            | 1373.57495 |
| F1LRZ7                    | SPAGAKSPAIAK            | 1273.52253 |
| A0A0G2K7Y2                | RDSETEVEELR             | 1442.61589 |
| P34058                    | EKEISDDEAEIEEKGEK       | 1944.79577 |
| F1LRZ7                    | SPAIVKSPVEAK            | 1401.60625 |
| A0A0G2K5C6                | HSPGEITGPGGHFMTSDSSLTK  | 2323.00605 |
| D3Z8E6                    | APVHFVEPLSPTGVPGHR      | 1976.97422 |
| Q7TP42                    | KEETPGTPK               | 1066.48163 |
| F1LRZ7                    | SPGEAKSPAIAK            | 1251.56167 |
| F1LNK0                    | DKVTDGITKSPEK           | 1497.71963 |
| Q5XI97                    | GAQADHFTQTPSPGSQVQVR    | 2304.07685 |
| D3ZFB6                    | HPSSQLAGPGVEGGEGTQKPR   | 2169.00844 |
| F1LRZ7                    | EEAKSPEKEETR            | 1512.65776 |
| Q5U2M6                    | VHGHSDEIEIEIEEQPR       | 1886.71886 |
| A0A0G2K5C6                | GPDSGAEVEIEEK           | 1325.56207 |
| D4ABZ3                    | ASPELGHPLSQEDSR         | 1702.74322 |
| P29066                    | DDKDEEDDGTGSPHLNNR      | 2093.80438 |
| B2GV22                    | VAGGSGSESPLEGR          | 1495.67883 |
| D4ABZ4                    | AAGGAASPLGGGAR          | 1249.56849 |
| G3V907                    | AKPSPAPSPTISAPDASGPQK   | 2084.00598 |
| B5DF41                    | QAGDPSNTPAEDR           | 1437.56419 |
| Q63624                    | APSPAPAVSPK             | 1101.534   |
| F1LRZ7                    | EEVKSPVEEVK             | 1352.6345  |
| A0A0G2JXK1                | MAGPPAPPGGSPR           | 1271.56023 |
| F1LPM3                    | RKSEPAVGPPR             | 1273.64126 |
| P19527                    | DEPPSEGEAIEIEIEEK       | 1911.73792 |
| D4A0U3                    | NDPELGKESPDLK           | 1521.68325 |
| P06685                    | YEPAAVSEHGDKK           | 1510.65736 |
| P07335                    | PFSNSHNTQK              | 1239.51539 |
| A0A0G2JZX5                | AQNPAYFEGKPASLDEGAMAGAR | 2431.0748  |
| F1LNK0                    | VTDGITKSPEKR            | 1410.69884 |
| Q7TP42                    | GAPGDHGPEGSGGER         | 1459.55978 |
| Q91Y79                    | HDDGTQSDSENAGVHR        | 1804.68822 |
| D3ZUT8                    | RLSGGAVPSASMTR          | 1469.69304 |
| A0A0G2K0M8                | NPTEAATAPASPK           | 1334.59879 |
| Q63633                    | EIQSITDESRGSIR          | 1670.77452 |
| P02091; P11517;<br>Q62669 | VVAGVASALAHK            | 1202.6293  |
| F1LRL9                    | HSPTEDIEIAK             | 1335.54642 |

|                           |                            |            |
|---------------------------|----------------------------|------------|
| Q63092                    | ATPATEESTVPAAQSSAAPAAK     | 2135.98563 |
| B2GV74                    | KLDEDASPNEEK               | 1454.60466 |
| Q9JMC1                    | RPIPPADGCLHTPVQAAGLATSPPR  | 2659.31743 |
| F1LRZ7                    | SPAEEKSPVVAK               | 1343.60078 |
| A0A0G2K8W9                | HDTASTQSTPASSR             | 1612.65988 |
| Q5HZV9                    | HGGGIVADLSQQSLKDGVER       | 2146.02884 |
| A0A0G2K1P1                | SPSGGEHAPSEDSGK            | 1521.58532 |
| P84087                    | AALEQPCEGSLTRPK            | 1736.80371 |
| Q5U2N3                    | TAGTPDGPEAPPDPASPDASFGK    | 2318.98128 |
| A0A0G2K5C6                | GHWDDGTNDSLEK              | 1668.61735 |
| Q8CG07                    | RPAAAAAAGSASPR             | 1333.63724 |
| F1LQN3                    | DKEDLVCSAALHSPQESPVGK      | 2347.06357 |
| O08838                    | AALPAGEGESPEGAK            | 1463.64138 |
| F1LNK0                    | APHWTSASLTEAAHPSPEMK       | 2436.08022 |
| F1LPT4                    | GGPCVESCAGAPGSPPR          | 1832.74555 |
| F1LRL9                    | EVPSKEEQSPVK               | 1436.66687 |
| P19527                    | AEEAKDEPPSEGEAEKEKEK       | 2439.9923  |
| Q63003                    | GGHGAINAPSAPDASPPHPR       | 2122.95667 |
| O88778                    | SLSDPKPLSPTAEESAK          | 1836.86267 |
| G3V8D6                    | ALRPGDLPPSPDDVK            | 1656.79928 |
| A0A0G2K8W9                | GDQVSQNGLPAAEQGSPR         | 1819.79705 |
| Q5EIC4                    | KASPEPPDSAESALK            | 1606.73601 |
| A0A1E1ERK2                | TAKDSDDDDVTVTVDR           | 1946.78627 |
| Q62976                    | RLEDEQPPTLSPK              | 1589.75708 |
| D4A3T3                    | KADSDSEDKGEESKPK           | 1829.78006 |
| Q3ZB99                    | VQVAPLQGSPLSHDDR           | 1895.90112 |
| P06687; P06685;<br>P06686 | QGAIVAVTGDGVNDSPALK        | 1891.9161  |
| Q63003                    | RESPGEWGADVPR              | 1535.66385 |
| Q5BJT1                    | APSLPAPPHSGAPGSPR          | 1675.7952  |
| B1WC16                    | KEVQSPEQVK                 | 1251.59806 |
| B5DFI3                    | AIEQADLLQEEDESPR           | 1922.83791 |
| F1LS42                    | HPPVLTPPDQEVIR             | 1677.836   |
| Q63622                    | YQDEDGPHDHS�PR             | 1745.69152 |
| Q99P55                    | RNSLTGEEGELAK              | 1483.67883 |
| F1LRZ7                    | SPAEVKSPVEAK               | 1321.63992 |
| P12839                    | AEEEGGSEEEVGDKSPQESK       | 2200.87654 |
| P12839                    | EKAEEEGGSEEEVGDK           | 1801.70114 |
| D4AE00                    | AFYGSEEDEAKGPGSEEAATAALPAR | 2704.17741 |
| A0A0G2K808                | LLHEDLDESDDDVDEK           | 1966.78012 |
| D3ZBU7                    | DKSPSEG DVAPPK             | 1406.61992 |
| P26453                    | RKPDQTLDEDDPGAAPLKSGSHLNDK | 2941.36873 |

|                       |                              |            |
|-----------------------|------------------------------|------------|
| D3ZEW7                | EQSPTSGKQSPTK                | 1454.65228 |
| G3V8P6                | AGDSDEESRPDDK                | 1500.5486  |
| D4AAZ8                | KASPEPEGETAGK                | 1380.60427 |
| P21707                | DDDAETGLTDGEEKEEPK           | 2057.80706 |
| M0R7A6                | MLSSDKTPSPK                  | 1270.57488 |
| F1LRZ7                | SPAEVKSPAVAK                 | 1343.60078 |
| F1LRZ7                | SPGEAKSPAIAK                 | 1331.528   |
| O35987                | RHSGQDVHVVLK                 | 1454.72639 |
| F8WFS9                | LEQEQEGEKDAATEEPGSPVK        | 2351.02862 |
| Q5HZV9                | HGGGIVADLSQQSLK              | 1589.76831 |
| P63319                | MGPSSSPIPSPSPSTDSK           | 1935.84055 |
| O70593                | GPDRTPPSEEDSAEAER            | 1922.77637 |
| Q5BJP4                | DKSPVREPIDNLTPEER            | 2074.98049 |
| A0A0G2JSH4            | IQAAAASPPANATAASDTNAGDR      | 2149.95098 |
| Q63259                | AEDSSEGHEEEVLGGHGEK          | 2075.81896 |
| F1LMW7                | EAAEAEPAPGSPSAETEGASASSTSSPK | 2812.16803 |
| G3V8D6                | REDSGPEVQPMDK                | 1664.69858 |
| D3ZE17                | KVPLPGGSPEVK                 | 1384.72359 |
| D3ZGN7                | GRSEEELEASK                  | 1314.55732 |
| G3V6P7                | KGTGDCSDEEVDGK               | 1576.58327 |
| P26453                | KPDQTLDEDDPGAAPLKGSGSHLNDK   | 2785.26762 |
| B5DFK6                | HSSLPTESDEDIAPAQR            | 1932.83349 |
| M0R7B4                | KASGPPVSELITK                | 1406.72907 |
| G3V8W2                | EDAPPEDKESESEAK              | 1740.68476 |
| Q9JKA9                | APPGPLPPAASPGPPAASPPAAPSSPR  | 2492.23335 |
| F1LRZ7                | KEEVKSPVEEVK                 | 1480.72947 |
| P13596;<br>A0A0G2K0M8 | AAFSKDESKEPIVEVR             | 1884.91028 |
| F1LT49                | RESGEGEEVADSAR               | 1700.67593 |
| D4A4T0                | LGTGGGSPDKSPSAQELK           | 1865.86406 |
| P10980                | EPVANQDPVSPSLVQGR            | 1872.88513 |
| Q7TP75                | VLHAQCHSTPDSAEDVR            | 2001.84843 |
| F1LRL9                | KESKEEAPEATK                 | 1426.64613 |
| Q8VHJ9                | LPLPDDHDLSDR                 | 1472.64171 |
| A0A0G2JT93            | RTSMGGTQQQFVEGVR             | 1860.84222 |
| P82995                | DKEVSDDEAEKEEK               | 1859.743   |
| F1M403                | KEDKPEVQSPVK                 | 1463.71415 |
| Q9QXY2                | KDSGSSSVFAESPGGK             | 1619.69487 |
| A0A0G2JWM2            | EHANIDAQSGSQASNPSATVSPR      | 2404.05248 |
| F1LMW7                | GEAAAERPGEAAVASSPSK          | 1864.84366 |
| A0A0G2K5C6            | EPVPAWEGKSPEQEVV             | 1917.87423 |
| G3V6C3                | GADSGGEKEEGVNR               | 1484.60131 |

|            |                                               |            |
|------------|-----------------------------------------------|------------|
| A0A0A0MXV8 | DPIEDINSPEHIQR                                | 1742.77452 |
| Q64548     | DKDSEVSTKPEGVHAPNQSPVEGK                      | 2712.25124 |
| F1LNZ5     | AAAAPSASSTPTVIASPK                            | 1706.83606 |
| P19527     | KEESAGEEQAAK                                  | 1356.56788 |
| D4A1G8     | HEDGTQSDSEDPLAK                               | 1708.66978 |
| D3ZT20     | RHSTEGEEGDVSDVGSR                             | 1896.77195 |
| A0A0G2JWK2 | AETSESSGSAPAVPEASAPK                          | 2039.8805  |
| Q75T81     | RDSDMTGHIQQPGR                                | 1734.73776 |
| D3ZNK1     | HGAGGISPAGQEV DANLQK                          | 1928.8862  |
| A0A0G2K366 | MEGEGGGSGGAGTSGDSDGGEQLLTVKHELRTANLTG<br>HAEK | 4403.75615 |
| G3V7R0     | APSL LALSPGLPGLTAGHRGTS LGDPRNSSQR            | 3503.56345 |
| C9DQJ9     | ARPASSPALLDAELRFHATRGP DVLSADR                | 3416.55492 |
| F1M8G8     | AINGSMGPATLNTSSLSEGGGGGGPANGTPAVPK            | 3337.38447 |
| G3V761     | LMSVSAIANGGGVPAGGLVATLQSAGAAGLSMTSK           | 3416.52797 |
| A0A0G2JUJ7 | AGTYSSTLKTLEDLTLDSGYGAGDSCRSLSLSSSK           | 3787.6657  |
| Q75Q39     | MAASKPVEAAMAAAAAPASNGVGVSSGGTAAPGSGAGT<br>LPR | 3700.64962 |
| F1LYG2     | NTTGASAASAASAMVALTASRAHSLGTLDPFTSTEDLN<br>CK  | 4373.93027 |
| D3Z8I2     | MGAPSPGGSSNSPRTYVMVHAMNSAGLAPGNPTRPK          | 3770.66383 |
| F1M897     | GTPGIPGSPGSRGDPGIGVAGPPGSPGQPGDKGPPGSR        | 3534.61626 |
| F1LNK0     | DGSPDAPATPEKEEVPFSEYK                         | 2452.98332 |
| F1M1Y0     | LPPGKPGVGDVSRPFSPPIHSSPPPIAPLAR               | 3387.70144 |
| A0A0G2JWW8 | MSTPPLAPTGMASGPFGGPQAQQAAR                    | 2702.15036 |
| Q66H48     | SSGGMQSSPAAEGLARPQVPSSSAFR                    | 2738.1641  |
| Q5XIB2     | GLVAMANAGPHDNGSQFFTLGRADELNNKHTIFGK           | 4050.83578 |
| Q03555     | EVHDELEDLPSPPPPLSPPTTSPHK                     | 2973.33188 |
| D3ZFB6     | AELAPETTEPVETPETVQATDLSVNPGEDSK               | 3435.55744 |
| A0A0G2K0F3 | GACSTPELPQFESVK                               | 1729.75028 |
| D3ZAA9     | TYETPPPSGLDPTFSNQVPPDAVR                      | 2859.32368 |
| P28572     | YAPTTTPSPEDGFVQPLHPDK                         | 2506.11738 |
| D3ZJR1     | FHDTSSPLMATQSSAEAHWAVR                        | 2509.0966  |
| M0R9Q1     | QPTPPFFGR                                     | 1126.50812 |
| F1LM42     | RFTPEEEMFK                                    | 1393.58578 |
| P07722     | NVTESPSFSAGDNPHVLYSPEFR                       | 2630.15589 |
| F1LNK0     | KETSPETSLIQDEVALK                             | 1967.95729 |
| P18291     | GDSGGPLVCKKVAAGIVSYGQNDGSTPR                  | 2870.35025 |
| Q6TXE2     | LDNTSMSTVIDGVVLPKTPEEILTEK                    | 2909.4465  |
| D4A475     | MAAAGADPGSEPAGGAQFFCTAGRGLPEFLMR              | 3336.46358 |
| A0A0G2K954 | ITRSQPNHTPSGPPGSSSPVSN GK                     | 2566.20457 |
| A0A0G2K5C6 | ATVSPSTDETPAGTLPGGSFHSALSVD R                 | 2924.33095 |
| D3ZB78     | FTPPAFIRPTR                                   | 1382.69805 |

|                       |                                      |            |
|-----------------------|--------------------------------------|------------|
| A0A096MJN4            | LTRESGTDFFPIPAVPPGTDPETEK            | 2634.23347 |
| A0A0G2JZ56;<br>FILM42 | KTSLVIVESTDDQPQVFEK                  | 2243.08429 |
| F1LNK0                | ETSPETSLIQDEVALK                     | 1839.86233 |
| Q5PQL7                | AAASGPASASAPAAEILLTPAR               | 2073.03761 |
| D3ZJ86                | LVLPMDDSEPALNSLDDTRHSPA              | 2573.15892 |
| P69682                | VTIPPPSSVAISNHVTPPPPIK               | 2415.26834 |
| P25122                | AALANEDCPHIDQALTPDEGLPFTR            | 2831.2706  |
| P47942                | GLYDGPVCEVSVTPK                      | 1700.76012 |
| P63086                | VADPDHDHTGFLTEYVATR                  | 2223.97065 |
| Q9ESH1                | AAAASAAEAGIATPGTEDSDDALLK            | 2396.08647 |
| Q62952                | GMYDGPVFDLTTTPK                      | 1737.74413 |
| D3ZWC6                | GSPVSEIGWETPPPEPR                    | 2001.89536 |
| D3ZML2                | ESPAGTPNPTPPSSPSVGGVPWR              | 2354.08127 |
| F1LQW8                | HFTEQWYPVTLPTGSGGSGGMGSGGGGGSGGGSGGK | 3305.39536 |
| D4A7L0                | TPFSIADILGRSMVPGAPSEPR               | 2378.15741 |
| A0A0G2K5C6            | VAELEEEQSQGSSSYSDWVK                 | 2337.97586 |
| D4A6H8                | VYGTAAVNSPVVSWK                      | 1657.79855 |
| P13668                | ESVPEFPLSPPK                         | 1406.66032 |
| P13668                | ESVPEFPLSPPKK                        | 1534.75529 |
| Q9JKS6                | LPAAVSLYSPTDEQSVMQK                  | 2143.99811 |
| Q91Y81                | IYHLPDAESDEDEDFK                     | 2002.79537 |
| D3ZJR1                | GIDPPQVLSPDMVPPSER                   | 2013.93512 |
| Q66HA5                | LPPPPDQLSPEPLPAAQVTPASTLTRPEVPQPPK   | 3839.99832 |
| P97603                | LELKPIDKSPDPNPVMTDTPIPR              | 2653.33068 |
| E9PU02                | FNFESVPESPEK                         | 1546.64613 |
| Q5M7A3                | EDYQEILDSPK                          | 1529.6771  |
| A0A0G2K1Y8            | KLDPAQSASRENLEEQGSIALR               | 2605.29813 |
| D3ZSZ4                | ELGLEDSPAHA                          | 1389.59337 |
| B4F7A3                | LDDGHLNNSLGSVPQADVYFPR               | 2494.13984 |
| P47942                | NLHQSGFSLSGAQIDDNIPR                 | 2249.03465 |
| F1LNK0                | LEETSKVSIETVAKEEESLK                 | 2458.18479 |
| M0R3Z8                | LLLLERPSPVR                          | 1372.77121 |
| F1M3W5                | FGDVEADSPVEQTHQDHSFAK                | 2513.12319 |
| Q5QD51                | EGITPWASFCK                          | 1343.63953 |
| Q4G008                | NNRPAFFSPSLK                         | 1457.69369 |
| A0A0G2K1Y8            | LDPAQSASRENLEEQGSIALR                | 2477.20317 |
| Q9Z2L0                | LTFDSSFSPTNGK                        | 1480.63557 |
| A0A0H2UHP5            | DDVEGMMSQGRPTTPIPDVQSTKGGSLAAGAKK    | 3553.66624 |
| F1M1Y0                | WVHFSASPEHVTPELTPR                   | 2285.03867 |
| A0A0G2K5C6            | KPSPFLSPSGDHEANGGETSLNPPGFVTATAEK    | 3516.63188 |
| F8WFS9                | VTMILQSPSFR                          | 1358.6538  |



|            |                                                |            |
|------------|------------------------------------------------|------------|
| G3V9D7     | VTQILQSPAFR                                    | 1339.67698 |
| P31016     | EQLMNSSLGSGTASLR                               | 1730.77789 |
| O88794     | GLATGDSPLGPMTHHGEEDWVYER                       | 2734.16032 |
| Q6MG08     | QLSVPASDEEDEVPVPR                              | 2142.99547 |
| Q03351     | GPVAVISGEEDSASPLHHINHGITTPSSLDAGPDTVVIGMT<br>R | 4315.07005 |
| A0A0G2K0S7 | QELANSSDVTLPDRPLSPPLTAPPTMK                    | 2955.45331 |
| P83868     | DWEDDSDEDMSNFDR                                | 1955.62732 |
| B1WC16     | ELFDYSPPLHK                                    | 1425.64501 |
| P25122     | LALSDSPDGRPGGFWR                               | 1810.82722 |
| Q02294     | EVAEVSPMSAANISIAAR                             | 1895.89325 |
| G3V8J5     | LEASTSDPLPAGGGSVLPGR                           | 2047.96959 |
| Q5FVJ0     | ELDDISLTPDPEPTHEDPNYLMANER                     | 3091.32382 |
| F1LRL9     | LGGDGSPTQVDVVSQFGSK                            | 2005.89028 |
| P08050     | MGQAGSTISNSHAQPFDFPDDNQNAK                     | 2857.18833 |
| A0A096MJN4 | LDPYDSSEDDKEYVGFATLPNQVHR                      | 2975.30949 |
| F1LMW7     | LSGFSFK                                        | 865.38555  |
| A0A0G2K613 | LSGLSFK                                        | 831.4012   |
| Q5U300     | ATLPSPDKLPGFK                                  | 1450.73416 |
| A0A0G2K5C6 | WLAESPVGLPPEEEDKLTR                            | 2246.07406 |
| A0A0G2K2M9 | ELSHSPPRDNSFESLEFR                             | 2226.98155 |
| F1LRL9     | SLMSSPEDLTK                                    | 1287.55381 |
| A0A0G2K5C6 | WLAESPVGLPPEEEDK                               | 1875.8412  |
| F1M5M9     | NDLQSPTEHISDYGFGGVMGR                          | 2360.0013  |
| D4ABP4     | GDFSPFGNTQGPSR                                 | 1546.63221 |
| Q9Z1T4     | GSESPNSFLDQEYR                                 | 1708.68504 |
| A0A0G2K0F3 | MLASPEDFETVR                                   | 1474.62837 |
| F1LQN3     | LSASPQELGKPYLESFQPNLHSTK                       | 2751.33894 |
| Q5M7V8     | IDISPSTFR                                      | 1115.51327 |
| Q9Z1T4     | LGDSLQDLYR                                     | 1259.56676 |
| Q64548     | EQDSPPMKPGVLDAIR                               | 1832.86123 |
| B1WC16     | IDISPSALR                                      | 1051.51835 |
| S4VP54     | LKISPEQHWDFTAEDLK                              | 2137.00016 |
| F1LRL9     | QGFSDKESPVSDLTSDLYQDK                          | 2439.05992 |
| Q7TP75     | HAFSPVASVESASGEVLHSPK                          | 2216.03834 |
| D4ADX8     | QMASQFPPPTPPPVDSQLKPLPASVTPQSPPAVK             | 3808.93836 |
| F8WFW5     | RLSCDGLGPSDLLGKPLAR                            | 2105.0573  |
| B2RZ79     | AASALLR                                        | 894.48084  |
| F1LN49     | RQSLGGFLK                                      | 1085.55032 |
| O35987     | KKSPNELVDDLK                                   | 1612.79822 |
| Q9WU70     | KLSLPTDLKPDLDVK                                | 1761.93979 |
| Q5PQP2     | KLSGDQITLPTTVDYSSVPK                           | 2229.10502 |

|            |                                               |            |
|------------|-----------------------------------------------|------------|
| Q5YLM1     | LLSPVAAASAAR                                  | 1206.62421 |
| Q9QY02     | GISPIVFDR                                     | 1083.52344 |
| D3ZWQ0     | RGSQPDALDGAGTSLLR                             | 1922.89676 |
| F1LQZ9     | AQSPLLPEPLK                                   | 1272.65993 |
| A0A096MKC0 | ALSSGGSITSPPLSPALPK                           | 1859.95142 |
| P48768     | GISALLLNQGDGDRK                               | 1636.80543 |
| D4A6H8     | HISPVQALSEFK                                  | 1435.69811 |
| F1MA89     | SASADNLILPR                                   | 1236.59839 |
| F1LNK0     | EESTETPDIPAIPSDVTQPQPEAVVSEPAEVR              | 3497.62071 |
| A0A0G2K2D6 | RLSLESEGANEGAAAPELSALEEAFR                    | 2868.34112 |
| A0A0G2K0F3 | DKSDSETEGLVFR                                 | 1633.71052 |
| A0A0U1RRX0 | RLSPPGSGSGVPGGPLLPTAGR                        | 2224.12341 |
| Q9JMB3     | VISQTNLITVTPEK                                | 1723.88776 |
| Q1M168     | DEWQDEDLPRPLPEDTGEDHLGGTVEDSSPPSTLNLSGA<br>HR | 4636.03836 |
| Q64548     | SPPVAMETASTGVAAPDALDHSSSPTLK                  | 2932.36456 |
| A0A0G2JYE0 | VPLAAVAGSEGPEQLQPPCPSQTGSPPVGLIK              | 3261.62251 |
| Q5XI21     | GDLSQHATPLPTPAVLPGDSPITPTPEQIGK               | 3214.60315 |
| I7FKL4     | FSWGAEGQKPGFGYGGR                             | 1880.81157 |
| F1LRL9     | QSPDHPTVGAGMLHITENGPTVDYSPSDIQDSSLCHK         | 4126.83357 |
| G3V8P8     | GSPSGLAPILR                                   | 1147.5871  |
| F1LRL9     | ESVASGDDRAEEDMDEALEK                          | 2275.89081 |
| Q75Q39     | ASPALGSGPDGSGDSLEMSSLDLDR                     | 2285.95916 |
| D3ZGQ8     | LSPIPEEVVR                                    | 1218.61298 |
| F1M6V8     | ASPGPGGLSGGESLLVK                             | 1605.78838 |
| S4VP54     | ISPEQHWDFTAEDLK                               | 1895.82114 |
| A0A0G2QC21 | MSGFIYQGK                                     | 1110.46896 |
| F1LRL9     | ESTAAAYQTSSSPIDAAAEPYGFR                      | 2667.16103 |
| A0A0G2JSL4 | ASGPLSPPTGPPSPVPTGPAVR                        | 2119.05835 |
| D3ZMS5     | ESDILSDEEEDFHHLK                              | 2119.88559 |
| Q9JKA9     | DSASPGAASGLDPLDSAR                            | 1766.75926 |
| D3ZYW8     | ALDPAPLAQPTPVGVSQTSPELEHR                     | 2690.31854 |
| Q6J4I0     | IAESHLQTISNLSNQASEEDELGELR                    | 3221.44817 |
| Q63622     | NLSQIENVHGYVLQSHISPLK                         | 2456.23335 |
| A0A0G2K0S7 | KQELANSSDVTLPDRPLSPPLTAPPTMK                  | 3083.54828 |
| A0A0H2UHZ2 | EFITGDVEPTDAESAWHSENEEDDKLAGDMK               | 3545.45741 |
| A0A0H2UHA7 | ETLFSPVSTEEMLRPPSPPKK                         | 2547.25645 |
| Q68FR9     | GATPAEDEDNDIDLFGSDEEEEDKEAAR                  | 3262.27032 |
| A0A0H2UHZ2 | EFITGDVEPTDAESAWHSENEEDDK                     | 2930.15238 |
| A0A0G2JXG5 | SAGGPCPAGAGSGPGGASCPVGVSPGGVSMFR              | 2925.24777 |
| P08050     | VAAGHELQPLAIVDQRPSSR                          | 2224.12341 |
| A0A0G2K2M9 | AAEIPAVASCWVGQVSPPEHK                         | 2313.07334 |

|            |                                         |            |
|------------|-----------------------------------------|------------|
| Q80VJ4     | LTLEGLEEDDDDDDKASPTVLHK                 | 2635.16584 |
| A0A0G2K8W9 | AQTLPTSVVTTITSESSPGK                    | 1982.96819 |
| A0A0G2JZ56 | LSWGTENLDNVALSSSPIHSGR                  | 2420.12419 |
| A0A0G2K889 | TELLREDTLMAADEGSTKQAGETPMAADGETNGSCEK   | 4154.73597 |
| G3V7G0     | DFQEYVEPGEDFPASPQR                      | 2190.90157 |
| B5DFK6     | VDIITEEMPENALPSDEDDKDPNDPYR             | 3197.35043 |
| F1LS01     | FDWGPAPPTTFKPNSPDLAK                    | 2266.05801 |
| Q9JIR4     | LQTHDESSLPLQPSPFMPR                     | 2357.09956 |
| A0A0G2JTR4 | GPPEGSETMPYIDESPTMSPQLSAR               | 2757.17834 |
| O08618     | LGIAVIHGEAQDAESDLVDGRHSPPMVR            | 3065.45102 |
| O08618     | LGIAVIHGEAQDAESDLVDGRHSPPMVR            | 3049.45611 |
| Q68FP9     | MADTSGEVAAVPASGAANGLSNGAGATPAQPNNPLSR   | 3517.60133 |
| F1LRL9     | DVMSDETNNEETESPSQEFVNITK                | 2823.15502 |
| Q5QD51     | VIETVVISSETGESPECVGAHLLPAEK             | 2844.37367 |
| D3ZT07     | FGIHVYQFPECDSDEDEDFKQQDR                | 3084.23534 |
| D3ZJR1     | TVFAGAVPVLASPPPK                        | 1727.91319 |
| Q5PPM8     | IINLGPVHPGPLSPEPQPMGVR                  | 2385.21486 |
| P31044     | VLTPQTVMNRPSSISWDGLDPGK                 | 2578.23711 |
| A0A0G2JYE0 | EVDGLLTSDPMGSPVSSK                      | 1898.8453  |
| O35314     | WWQQEEQLEPEESREEVSFPDR                  | 2913.23632 |
| O88778     | EPELEMESLTGSPEDR                        | 1898.77253 |
| G3V9Y1     | QLHIEGASLELSDDDTESK                     | 2166.94383 |
| F1LRL9     | SAGFIPIKEDFSPEKK                        | 1872.91431 |
| Q66X93     | VSVTVDYIRPASPATETVPAFSEK                | 2672.29674 |
| F1M1Y0     | LPPGKPGVGDVSRPFSPIHSSSPPIAPLAR          | 3307.73511 |
| Q56R18     | NVPQEELEDSDVDADFK                       | 2116.85943 |
| P13668     | ASGQAFELILSPR                           | 1468.71957 |
| A0A0G2K2P5 | DDISEIQLASDHSVR                         | 1851.81203 |
| A0A0G2JSZ1 | FVQDHFHDHNISPTIGASFMTK                  | 2472.10537 |
| A0A0G2K336 | GSYMEVEDNRSQVETEDLILKPGVVHVIDIDRGDEK    | 4164.97951 |
| Q03555     | EVHDELEDLPSPPPLSPPPTTSPHK               | 2893.36555 |
| Q9JIR4     | MERPSISVISPTSPGALK                      | 1949.97659 |
| A1A5L2     | AIGGIILTASHNPGGPNDFGIK                  | 2286.12782 |
| D3ZPJ0     | LVSQEHLSSPEALR                          | 1871.96265 |
| O08838     | IDVESTELASSESPQAAELEAGAPQEK             | 2866.28775 |
| D3ZBU7     | SPPEMSLLHDVGPSPAIAK                     | 1924.92383 |
| Q5QD51     | SPEQPAGSDTPSELVLSGHGPAEASGAAGDPADADPATK | 3808.68214 |
| B2GUY4     | STSPPPSPEVWAESR                         | 1706.74216 |
| Q64548     | SPPVAMETASTGVAAVPDALDHSSSPTLK           | 2916.36964 |

## 1 **References**

- 2 **1.** Z. Xiong, Y. Chen, L. Zhang, J. Ren, Q. Zhang, M. Ye, W. Zhang and H. Zou, *ACS Appl. Mater. Interfaces*, 2014, **6**,  
3 22743-22750.
- 4 **2.** F. Jabeen, M. N. Haq, M. N. Ashiq, M. Rainer, C. W. Huck and G. K. Bonn, *J. Sep. Sci.*, 2016, **39**, 4175–4182.
- 5 **3.** R. X. Su, W. Qi, Z. M. He, S. X. Yuan and Y. B. Zhang, *Food Chemistry*, 2007, **104**, 276–286.
- 6 **4.** T. E. Thingholm, O. N. Jensen, P. J. Robinson and M. R. Larsen, *Molecular & cellular proteomics : MCP*, 2008, **7**,  
7 661-671.
- 8 **5.** H. J. Zhou, R. J. Tian, M. L. Ye, S. Y. Xu, S. Feng, C. S. Pan, X. G. Jiang, X. Li and H. F. Zou, *Electrophoresis*, 2007,  
9 **28**, 2201–2215.

10
